# Supplementary material for: Uncovering potential host proteins and pathways that may interact with eukaryotic short linear motifs in viral proteins of MERS, SARS and SARS2 coronaviruses that infect humans
Source: PLoS One. 2021 Feb 3;16(2):e0246150. doi: 10.1371/journal.pone.0246150 (PMC7857568; doi:10.1371/journal.pone.0246150)
Supplement: S8 Table — (XLSX) [file pone.0246150.s008.xlsx]

## Sheet: ELMs_g6_2
SLiM id	SLiM name	SLiM function	Viral protein
ELME000423	DOC_MAPK_NFAT4_5	An extended D site specifically recognized by the JNK kinases	nsp01,nsp02
ELME000302	LIG_HCF-1_HBM_1	The DHxY Host Cell Factor-1 binding motif (HBM) interacts with the N-terminal kelch propeller domain of the cell cycle regulator HCF-1	nsp03
ELME000321	CLV_C14_Caspase3-7	Caspase-3 and Caspase-7 cleavage site.	nsp06
ELME000362	LIG_WD40_WDR5_WIN_2	Generalised metazoan variant of the Win (WDR5 interaction) motif, which in Vertebrates binds to the central tunnel of the WD40 repeat domain of WDR5 to mediate assembly of histone modification complexes.	nsp03
ELME000237	DOC_PP2B_PxIxI_1	Calcineurin substrate docking site, leads to the effective dephosphorylation of serine/threonine phosphorylation sites.	nsp15
ELME000393	MOD_SUMO_rev_2	Inverted version of SUMOylation motif recognized for modification by SUMO-1	nsp05
ELME000157	LIG_SH3_5	PXXDY motif recognized by some SH3 domains	nsp01
ELME000041	LIG_Sin3_3	Motif interacts with PAH2 domain in the Sin3 scaffold protein (not mad or sp-1 like).	nsp04
ELME000062	MOD_PKA_2	Secondary preference for PKA-type AGC kinase phosphorylation.	nsp10
ELME000334	MOD_LATS_1	The LATS phosphorylation motif is recognised by the LATS kinases for Ser/Thr phosphorylation. Substrates are often found toward the end of the Hippo signalling pathway.	nsp04
ELME000434	DOC_MAPK_HePTP_8	A kinase docking motif that interacts with the ERK1/2 and p38 subfamilies of MAP kinases.	nsp01
ELME000133	LIG_TRAF6	TRAF6 binding site. Members of the tumor necrosis factor receptor (TNFR) superfamily initiate intracellular signaling by recruiting the C-domain of the TNFR-associated factors (TRAFs) through their cytoplasmatic tails.	nsp01
