# Supplementary material for: Uncovering potential host proteins and pathways that may interact with eukaryotic short linear motifs in viral proteins of MERS, SARS and SARS2 coronaviruses that infect humans
Source: PLoS One. 2021 Feb 3;16(2):e0246150. doi: 10.1371/journal.pone.0246150 (PMC7857568; doi:10.1371/journal.pone.0246150)
Supplement: S19 Table — (XLSX) [file pone.0246150.s019.xlsx]

## Sheet: g3_elm_kegg1
ELM id	Viral protein	Interaction protein	ELM name	Pathway id	Pathway name
ELME000442	nsp09	O14920	MOD_Plk_1	hsa05221	Acute myeloid leukemia
ELME000289	nsp06	P01106	DEG_SCF_FBW7_1	hsa05221	Acute myeloid leukemia
ELME000136	nsp07	P01106	DOC_WW_Pin1_4	hsa05221	Acute myeloid leukemia
ELME000159	nsp07	P01106	MOD_ProDKin_1	hsa05221	Acute myeloid leukemia
ELME000136	nsp07	P10276	DOC_WW_Pin1_4	hsa05221	Acute myeloid leukemia
ELME000159	nsp07	P10276	MOD_ProDKin_1	hsa05221	Acute myeloid leukemia
ELME000269	nsp02,nsp08	P19838	DEG_SCF_TRCP1_1	hsa05221	Acute myeloid leukemia
ELME000007	nsp12	P24385	LIG_Rb_LxCxE_1	hsa05221	Acute myeloid leukemia
ELME000005	N	P27986	LIG_SH3_1	hsa05221	Acute myeloid leukemia
ELME000136	nsp07	P29590	DOC_WW_Pin1_4	hsa05221	Acute myeloid leukemia
ELME000335	nsp10	P29590	LIG_SUMO_SIM_anti_2	hsa05221	Acute myeloid leukemia
ELME000136	nsp07	P31749	DOC_WW_Pin1_4	hsa05221	Acute myeloid leukemia
ELME000136	nsp07	P40763	DOC_WW_Pin1_4	hsa05221	Acute myeloid leukemia
ELME000136	nsp07	Q04206	DOC_WW_Pin1_4	hsa05221	Acute myeloid leukemia
ELME000159	nsp07	Q07889	MOD_ProDKin_1	hsa05221	Acute myeloid leukemia
ELME000269	nsp02,nsp08	O95863	DEG_SCF_TRCP1_1	hsa04520	Adherens junction
ELME000269	nsp02,nsp08	P35222	DEG_SCF_TRCP1_1	hsa04520	Adherens junction
ELME000136	nsp07	P35222	DOC_WW_Pin1_4	hsa04520	Adherens junction
ELME000311	nsp09	P42768	LIG_Actin_WH2_1	hsa04520	Adherens junction
ELME000441	nsp13	P42768	LIG_GBD_Chelix_1	hsa04520	Adherens junction
ELME000136	nsp07	P84022	DOC_WW_Pin1_4	hsa04520	Adherens junction
ELME000311	nsp09	Q92558	LIG_Actin_WH2_1	hsa04520	Adherens junction
ELME000045	nsp09	Q92793	LIG_NRBOX	hsa04520	Adherens junction
ELME000311	nsp09	Q9Y6W5	LIG_Actin_WH2_1	hsa04520	Adherens junction
ELME000269	nsp02,nsp08	O00221	DEG_SCF_TRCP1_1	hsa04920	Adipocytokine signaling pathway
ELME000442	nsp09	O14920	MOD_Plk_1	hsa04920	Adipocytokine signaling pathway
ELME000269	nsp02,nsp08	P19838	DEG_SCF_TRCP1_1	hsa04920	Adipocytokine signaling pathway
ELME000117	nsp09	P20333	LIG_TRAF2_1	hsa04920	Adipocytokine signaling pathway
ELME000269	nsp02,nsp08	P25963	DEG_SCF_TRCP1_1	hsa04920	Adipocytokine signaling pathway
ELME000136	nsp07	P31749	DOC_WW_Pin1_4	hsa04920	Adipocytokine signaling pathway
ELME000136	nsp07	P35568	DOC_WW_Pin1_4	hsa04920	Adipocytokine signaling pathway
ELME000136	nsp07	P40763	DOC_WW_Pin1_4	hsa04920	Adipocytokine signaling pathway
ELME000136	nsp07	Q04206	DOC_WW_Pin1_4	hsa04920	Adipocytokine signaling pathway
ELME000269	nsp02,nsp08	Q15653	DEG_SCF_TRCP1_1	hsa04920	Adipocytokine signaling pathway
ELME000045	nsp09	Q9UBK2	LIG_NRBOX	hsa04920	Adipocytokine signaling pathway
ELME000269	nsp02,nsp08	P18848	DEG_SCF_TRCP1_1	hsa04261	Adrenergic signaling in cardiomyocytes
ELME000005	N	P27986	LIG_SH3_1	hsa04261	Adrenergic signaling in cardiomyocytes
ELME000136	nsp07	P31749	DOC_WW_Pin1_4	hsa04261	Adrenergic signaling in cardiomyocytes
ELME000269	nsp02,nsp08	P18848	DEG_SCF_TRCP1_1	hsa05034	Alcoholism
ELME000159	nsp07	Q07889	MOD_ProDKin_1	hsa05034	Alcoholism
ELME000007	nsp12	Q13547	LIG_Rb_LxCxE_1	hsa05034	Alcoholism
ELME000005	N	P27986	LIG_SH3_1	hsa04960	Aldosterone regulated sodium reabsorption
ELME000136	nsp07	P35568	DOC_WW_Pin1_4	hsa04960	Aldosterone regulated sodium reabsorption
ELME000117	nsp09	P25942	LIG_TRAF2_1	hsa05330	Allograft rejection
ELME000133	nsp04,nsp07	P25942	LIG_TRAF6	hsa05330	Allograft rejection
ELME000136	nsp07	P05067	DOC_WW_Pin1_4	hsa05010	Alzheimer's disease
ELME000005	N	P10636	LIG_SH3_1	hsa05010	Alzheimer's disease
ELME000429	nsp10	P55211	MOD_CDK_SPK_2	hsa05010	Alzheimer's disease
ELME000461	nsp12	P55211	MOD_DYRK1A_RPxSP_1	hsa05010	Alzheimer's disease
ELME000058	nsp02	Q14643	LIG_EVH1_2	hsa05010	Alzheimer's disease
ELME000269	nsp02,nsp08	P19838	DEG_SCF_TRCP1_1	hsa05146	Amoebiasis
ELME000005	N	P27986	LIG_SH3_1	hsa05146	Amoebiasis
ELME000136	nsp07	Q04206	DOC_WW_Pin1_4	hsa05146	Amoebiasis
ELME000136	nsp07	Q05397	DOC_WW_Pin1_4	hsa05146	Amoebiasis
ELME000159	nsp07	Q05397	MOD_ProDKin_1	hsa05146	Amoebiasis
ELME000289	nsp06	P05412	DEG_SCF_FBW7_1	hsa05031	Amphetamine addiction
ELME000136	nsp07	P05412	DOC_WW_Pin1_4	hsa05031	Amphetamine addiction
ELME000269	nsp02,nsp08	P18848	DEG_SCF_TRCP1_1	hsa05031	Amphetamine addiction
ELME000007	nsp12	Q13547	LIG_Rb_LxCxE_1	hsa05031	Amphetamine addiction
ELME000425	nsp04,N	O43524	DOC_PP2A_B56_1	hsa04152	AMPK signaling pathway
ELME000007	nsp12	P24385	LIG_Rb_LxCxE_1	hsa04152	AMPK signaling pathway
ELME000005	N	P27986	LIG_SH3_1	hsa04152	AMPK signaling pathway
ELME000136	nsp07	P31749	DOC_WW_Pin1_4	hsa04152	AMPK signaling pathway
ELME000136	nsp07	P35568	DOC_WW_Pin1_4	hsa04152	AMPK signaling pathway
ELME000289	nsp06	P36956	DEG_SCF_FBW7_1	hsa04152	AMPK signaling pathway
ELME000442	nsp09	P36956	MOD_Plk_1	hsa04152	AMPK signaling pathway
ELME000045	nsp09	Q9UBK2	LIG_NRBOX	hsa04152	AMPK signaling pathway
ELME000106	nsp10	P04637	DOC_CyclinA_RxL_1	hsa05014	Amyotrophic lateral sclerosis (ALS)
ELME000136	nsp07	P04637	DOC_WW_Pin1_4	hsa05014	Amyotrophic lateral sclerosis (ALS)
ELME000117	nsp09	P20333	LIG_TRAF2_1	hsa05014	Amyotrophic lateral sclerosis (ALS)
ELME000429	nsp10	P55211	MOD_CDK_SPK_2	hsa05014	Amyotrophic lateral sclerosis (ALS)
ELME000461	nsp12	P55211	MOD_DYRK1A_RPxSP_1	hsa05014	Amyotrophic lateral sclerosis (ALS)
ELME000136	nsp07	Q9UER7	DOC_WW_Pin1_4	hsa05014	Amyotrophic lateral sclerosis (ALS)
ELME000335	nsp10	Q9UER7	LIG_SUMO_SIM_anti_2	hsa05014	Amyotrophic lateral sclerosis (ALS)
ELME000442	nsp09	O14920	MOD_Plk_1	hsa04210	Apoptosis
ELME000133	nsp04,nsp07	O43187	LIG_TRAF6	hsa04210	Apoptosis
ELME000106	nsp10	P04637	DOC_CyclinA_RxL_1	hsa04210	Apoptosis
ELME000136	nsp07	P04637	DOC_WW_Pin1_4	hsa04210	Apoptosis
ELME000269	nsp02,nsp08	P19838	DEG_SCF_TRCP1_1	hsa04210	Apoptosis
ELME000269	nsp02,nsp08	P25963	DEG_SCF_TRCP1_1	hsa04210	Apoptosis
ELME000005	N	P27986	LIG_SH3_1	hsa04210	Apoptosis
ELME000136	nsp07	P31749	DOC_WW_Pin1_4	hsa04210	Apoptosis
ELME000133	nsp04,nsp07	P51617	LIG_TRAF6	hsa04210	Apoptosis
ELME000429	nsp10	P55211	MOD_CDK_SPK_2	hsa04210	Apoptosis
ELME000461	nsp12	P55211	MOD_DYRK1A_RPxSP_1	hsa04210	Apoptosis
ELME000136	nsp07	Q04206	DOC_WW_Pin1_4	hsa04210	Apoptosis
ELME000269	nsp02,nsp08	P35222	DEG_SCF_TRCP1_1	hsa05412	Arrhythmogenic right ventricular cardiomyopathy (ARVC)
ELME000136	nsp07	P35222	DOC_WW_Pin1_4	hsa05412	Arrhythmogenic right ventricular cardiomyopathy (ARVC)
ELME000155	nsp15	Q14118	LIG_SH3_3	hsa05412	Arrhythmogenic right ventricular cardiomyopathy (ARVC)
ELME000117	nsp09	P25942	LIG_TRAF2_1	hsa05310	Asthma
ELME000133	nsp04,nsp07	P25942	LIG_TRAF6	hsa05310	Asthma
ELME000117	nsp09	P25942	LIG_TRAF2_1	hsa05320	Autoimmune thyroid disease
ELME000133	nsp04,nsp07	P25942	LIG_TRAF6	hsa05320	Autoimmune thyroid disease
ELME000136	nsp07	Q05397	DOC_WW_Pin1_4	hsa04360	Axon guidance
ELME000159	nsp07	Q05397	MOD_ProDKin_1	hsa04360	Axon guidance
ELME000159	nsp07	Q14934	MOD_ProDKin_1	hsa04360	Axon guidance
ELME000269	nsp02,nsp08	O00221	DEG_SCF_TRCP1_1	hsa04662	B cell receptor signaling pathway
ELME000442	nsp09	O14920	MOD_Plk_1	hsa04662	B cell receptor signaling pathway
ELME000237	N	O95644	DOC_PP2B_PxIxI_1	hsa04662	B cell receptor signaling pathway
ELME000461	nsp12	O95644	MOD_DYRK1A_RPxSP_1	hsa04662	B cell receptor signaling pathway
ELME000289	nsp06	P05412	DEG_SCF_FBW7_1	hsa04662	B cell receptor signaling pathway
ELME000136	nsp07	P05412	DOC_WW_Pin1_4	hsa04662	B cell receptor signaling pathway
ELME000269	nsp02,nsp08	P19838	DEG_SCF_TRCP1_1	hsa04662	B cell receptor signaling pathway
ELME000269	nsp02,nsp08	P25963	DEG_SCF_TRCP1_1	hsa04662	B cell receptor signaling pathway
ELME000005	N	P27986	LIG_SH3_1	hsa04662	B cell receptor signaling pathway
ELME000136	nsp07	P31749	DOC_WW_Pin1_4	hsa04662	B cell receptor signaling pathway
ELME000136	nsp07	Q04206	DOC_WW_Pin1_4	hsa04662	B cell receptor signaling pathway
ELME000005	N	Q06187	LIG_SH3_1	hsa04662	B cell receptor signaling pathway
ELME000159	nsp07	Q07889	MOD_ProDKin_1	hsa04662	B cell receptor signaling pathway
ELME000269	nsp02,nsp08	Q15653	DEG_SCF_TRCP1_1	hsa04662	B cell receptor signaling pathway
ELME000005	N	P27986	LIG_SH3_1	hsa05100	Bacterial invasion of epithelial cells
ELME000269	nsp02,nsp08	P35222	DEG_SCF_TRCP1_1	hsa05100	Bacterial invasion of epithelial cells
ELME000136	nsp07	P35222	DOC_WW_Pin1_4	hsa05100	Bacterial invasion of epithelial cells
ELME000311	nsp09	P42768	LIG_Actin_WH2_1	hsa05100	Bacterial invasion of epithelial cells
ELME000441	nsp13	P42768	LIG_GBD_Chelix_1	hsa05100	Bacterial invasion of epithelial cells
ELME000136	nsp07	Q05397	DOC_WW_Pin1_4	hsa05100	Bacterial invasion of epithelial cells
ELME000159	nsp07	Q05397	MOD_ProDKin_1	hsa05100	Bacterial invasion of epithelial cells
ELME000311	nsp09	Q92558	LIG_Actin_WH2_1	hsa05100	Bacterial invasion of epithelial cells
ELME000311	nsp09	Q9Y6W5	LIG_Actin_WH2_1	hsa05100	Bacterial invasion of epithelial cells
ELME000425	nsp04,N	O15169	DOC_PP2A_B56_1	hsa05217	Basal cell carcinoma
ELME000106	nsp10	P04637	DOC_CyclinA_RxL_1	hsa05217	Basal cell carcinoma
ELME000136	nsp07	P04637	DOC_WW_Pin1_4	hsa05217	Basal cell carcinoma
ELME000103	nsp03	P12644	CLV_PCSK_PC7_1	hsa05217	Basal cell carcinoma
ELME000269	nsp02,nsp08	P35222	DEG_SCF_TRCP1_1	hsa05217	Basal cell carcinoma
ELME000136	nsp07	P35222	DOC_WW_Pin1_4	hsa05217	Basal cell carcinoma
ELME000289	nsp06	P13051	DEG_SCF_FBW7_1	hsa03410	Base excision repair
ELME000140	nsp02	P13051	LIG_PCNA_PIPBox_1	hsa03410	Base excision repair
ELME000140	nsp02	P18858	LIG_PCNA_PIPBox_1	hsa03410	Base excision repair
ELME000140	nsp02	P39748	LIG_PCNA_PIPBox_1	hsa03410	Base excision repair
ELME000335	nsp10	Q13569	LIG_SUMO_SIM_anti_2	hsa03410	Base excision repair
ELME000140	nsp02	Q15054	LIG_PCNA_PIPBox_1	hsa03410	Base excision repair
ELME000106	nsp10	O00716	DOC_CyclinA_RxL_1	hsa05219	Bladder cancer
ELME000289	nsp06	P01106	DEG_SCF_FBW7_1	hsa05219	Bladder cancer
ELME000136	nsp07	P01106	DOC_WW_Pin1_4	hsa05219	Bladder cancer
ELME000159	nsp07	P01106	MOD_ProDKin_1	hsa05219	Bladder cancer
ELME000106	nsp10	P04637	DOC_CyclinA_RxL_1	hsa05219	Bladder cancer
ELME000136	nsp07	P04637	DOC_WW_Pin1_4	hsa05219	Bladder cancer
ELME000106	nsp10	P06400	DOC_CyclinA_RxL_1	hsa05219	Bladder cancer
ELME000429	nsp10	P06400	MOD_CDK_SPK_2	hsa05219	Bladder cancer
ELME000007	nsp12	P24385	LIG_Rb_LxCxE_1	hsa05219	Bladder cancer
ELME000106	nsp10	P38936	DOC_CyclinA_RxL_1	hsa05219	Bladder cancer
ELME000140	nsp02	P38936	LIG_PCNA_PIPBox_1	hsa05219	Bladder cancer
ELME000106	nsp10	Q01094	DOC_CyclinA_RxL_1	hsa05219	Bladder cancer
ELME000106	nsp10	Q14209	DOC_CyclinA_RxL_1	hsa05219	Bladder cancer
ELME000058	nsp02	P21817	LIG_EVH1_2	hsa04020	Calcium signaling pathway
ELME000058	nsp02	Q13255	LIG_EVH1_2	hsa04020	Calcium signaling pathway
ELME000058	nsp02	Q14643	LIG_EVH1_2	hsa04020	Calcium signaling pathway
ELME000237	N	O95644	DOC_PP2B_PxIxI_1	hsa04024	cAMP signaling pathway
ELME000461	nsp12	O95644	MOD_DYRK1A_RPxSP_1	hsa04024	cAMP signaling pathway
ELME000289	nsp06	P05412	DEG_SCF_FBW7_1	hsa04024	cAMP signaling pathway
ELME000136	nsp07	P05412	DOC_WW_Pin1_4	hsa04024	cAMP signaling pathway
ELME000269	nsp02,nsp08	P19838	DEG_SCF_TRCP1_1	hsa04024	cAMP signaling pathway
ELME000269	nsp02,nsp08	P25963	DEG_SCF_TRCP1_1	hsa04024	cAMP signaling pathway
ELME000005	N	P27986	LIG_SH3_1	hsa04024	cAMP signaling pathway
ELME000136	nsp07	P31749	DOC_WW_Pin1_4	hsa04024	cAMP signaling pathway
ELME000136	nsp07	Q04206	DOC_WW_Pin1_4	hsa04024	cAMP signaling pathway
ELME000045	nsp09	Q92793	LIG_NRBOX	hsa04024	cAMP signaling pathway
ELME000005	N	P27986	LIG_SH3_1	hsa04973	Carbohydrate digestion and absorption
ELME000136	nsp07	P31749	DOC_WW_Pin1_4	hsa04973	Carbohydrate digestion and absorption
ELME000155	nsp15	P06729	LIG_SH3_3	hsa04514	Cell adhesion molecules (CAMs)
ELME000117	nsp09	P25942	LIG_TRAF2_1	hsa04514	Cell adhesion molecules (CAMs)
ELME000133	nsp04,nsp07	P25942	LIG_TRAF6	hsa04514	Cell adhesion molecules (CAMs)
ELME000106	nsp10	O00716	DOC_CyclinA_RxL_1	hsa04110	Cell cycle
ELME000425	nsp04,N	O60566	DOC_PP2A_B56_1	hsa04110	Cell cycle
ELME000425	nsp04,N	O96017	DOC_PP2A_B56_1	hsa04110	Cell cycle
ELME000289	nsp06	P01106	DEG_SCF_FBW7_1	hsa04110	Cell cycle
ELME000136	nsp07	P01106	DOC_WW_Pin1_4	hsa04110	Cell cycle
ELME000159	nsp07	P01106	MOD_ProDKin_1	hsa04110	Cell cycle
ELME000106	nsp10	P04637	DOC_CyclinA_RxL_1	hsa04110	Cell cycle
ELME000136	nsp07	P04637	DOC_WW_Pin1_4	hsa04110	Cell cycle
ELME000106	nsp10	P06400	DOC_CyclinA_RxL_1	hsa04110	Cell cycle
ELME000429	nsp10	P06400	MOD_CDK_SPK_2	hsa04110	Cell cycle
ELME000007	nsp12	P24385	LIG_Rb_LxCxE_1	hsa04110	Cell cycle
ELME000289	nsp06	P24864	DEG_SCF_FBW7_1	hsa04110	Cell cycle
ELME000106	nsp10	P28749	DOC_CyclinA_RxL_1	hsa04110	Cell cycle
ELME000106	nsp10	P30304	DOC_CyclinA_RxL_1	hsa04110	Cell cycle
ELME000442	nsp09	P30307	MOD_Plk_1	hsa04110	Cell cycle
ELME000106	nsp10	P38936	DOC_CyclinA_RxL_1	hsa04110	Cell cycle
ELME000140	nsp02	P38936	LIG_PCNA_PIPBox_1	hsa04110	Cell cycle
ELME000106	nsp10	P46527	DOC_CyclinA_RxL_1	hsa04110	Cell cycle
ELME000136	nsp07	P46527	DOC_WW_Pin1_4	hsa04110	Cell cycle
ELME000106	nsp10	P49918	DOC_CyclinA_RxL_1	hsa04110	Cell cycle
ELME000136	nsp07	P84022	DOC_WW_Pin1_4	hsa04110	Cell cycle
ELME000106	nsp10	Q01094	DOC_CyclinA_RxL_1	hsa04110	Cell cycle
ELME000106	nsp10	Q08999	DOC_CyclinA_RxL_1	hsa04110	Cell cycle
ELME000007	nsp12	Q13547	LIG_Rb_LxCxE_1	hsa04110	Cell cycle
ELME000106	nsp10	Q14209	DOC_CyclinA_RxL_1	hsa04110	Cell cycle
ELME000425	nsp04,N	Q14674	DOC_PP2A_B56_1	hsa04110	Cell cycle
ELME000045	nsp09	Q92793	LIG_NRBOX	hsa04110	Cell cycle
ELME000442	nsp09	Q99640	MOD_Plk_1	hsa04110	Cell cycle
ELME000106	nsp10	Q99741	DOC_CyclinA_RxL_1	hsa04110	Cell cycle
ELME000289	nsp06	P01106	DEG_SCF_FBW7_1	hsa05230	Central carbon metabolism in cancer
ELME000136	nsp07	P01106	DOC_WW_Pin1_4	hsa05230	Central carbon metabolism in cancer
ELME000159	nsp07	P01106	MOD_ProDKin_1	hsa05230	Central carbon metabolism in cancer
ELME000106	nsp10	P04637	DOC_CyclinA_RxL_1	hsa05230	Central carbon metabolism in cancer
ELME000136	nsp07	P04637	DOC_WW_Pin1_4	hsa05230	Central carbon metabolism in cancer
ELME000005	N	P27986	LIG_SH3_1	hsa05230	Central carbon metabolism in cancer
ELME000136	nsp07	P31749	DOC_WW_Pin1_4	hsa05230	Central carbon metabolism in cancer
ELME000159	nsp07	Q16665	MOD_ProDKin_1	hsa05230	Central carbon metabolism in cancer
ELME000237	N	O95644	DOC_PP2B_PxIxI_1	hsa04022	cGMP PKG signaling pathway
ELME000461	nsp12	O95644	MOD_DYRK1A_RPxSP_1	hsa04022	cGMP PKG signaling pathway
ELME000269	nsp02,nsp08	P18848	DEG_SCF_TRCP1_1	hsa04022	cGMP PKG signaling pathway
ELME000005	N	P27986	LIG_SH3_1	hsa04022	cGMP PKG signaling pathway
ELME000136	nsp07	P31749	DOC_WW_Pin1_4	hsa04022	cGMP PKG signaling pathway
ELME000136	nsp07	P35568	DOC_WW_Pin1_4	hsa04022	cGMP PKG signaling pathway
ELME000432	nsp09	Q02078	DOC_MAPK_MEF2A_6	hsa04022	cGMP PKG signaling pathway
ELME000058	nsp02	Q14643	LIG_EVH1_2	hsa04022	cGMP PKG signaling pathway
ELME000159	nsp07	Q14934	MOD_ProDKin_1	hsa04022	cGMP PKG signaling pathway
ELME000442	nsp09	O14920	MOD_Plk_1	hsa05142	Chagas disease (American trypanosomiasis)
ELME000289	nsp06	P05412	DEG_SCF_FBW7_1	hsa05142	Chagas disease (American trypanosomiasis)
ELME000136	nsp07	P05412	DOC_WW_Pin1_4	hsa05142	Chagas disease (American trypanosomiasis)
ELME000269	nsp02,nsp08	P19838	DEG_SCF_TRCP1_1	hsa05142	Chagas disease (American trypanosomiasis)
ELME000269	nsp02,nsp08	P25963	DEG_SCF_TRCP1_1	hsa05142	Chagas disease (American trypanosomiasis)
ELME000005	N	P27986	LIG_SH3_1	hsa05142	Chagas disease (American trypanosomiasis)
ELME000136	nsp07	P31749	DOC_WW_Pin1_4	hsa05142	Chagas disease (American trypanosomiasis)
ELME000432	nsp09	P45985	DOC_MAPK_MEF2A_6	hsa05142	Chagas disease (American trypanosomiasis)
ELME000133	nsp04,nsp07	P51617	LIG_TRAF6	hsa05142	Chagas disease (American trypanosomiasis)
ELME000136	nsp07	P84022	DOC_WW_Pin1_4	hsa05142	Chagas disease (American trypanosomiasis)
ELME000136	nsp07	Q04206	DOC_WW_Pin1_4	hsa05142	Chagas disease (American trypanosomiasis)
ELME000442	nsp09	O14920	MOD_Plk_1	hsa04062	Chemokine signaling pathway
ELME000425	nsp04,N	O43524	DOC_PP2A_B56_1	hsa04062	Chemokine signaling pathway
ELME000136	nsp07	P14598	DOC_WW_Pin1_4	hsa04062	Chemokine signaling pathway
ELME000269	nsp02,nsp08	P19838	DEG_SCF_TRCP1_1	hsa04062	Chemokine signaling pathway
ELME000269	nsp02,nsp08	P25963	DEG_SCF_TRCP1_1	hsa04062	Chemokine signaling pathway
ELME000005	N	P27986	LIG_SH3_1	hsa04062	Chemokine signaling pathway
ELME000136	nsp07	P31749	DOC_WW_Pin1_4	hsa04062	Chemokine signaling pathway
ELME000136	nsp07	P40763	DOC_WW_Pin1_4	hsa04062	Chemokine signaling pathway
ELME000311	nsp09	P42768	LIG_Actin_WH2_1	hsa04062	Chemokine signaling pathway
ELME000441	nsp13	P42768	LIG_GBD_Chelix_1	hsa04062	Chemokine signaling pathway
ELME000136	nsp07	Q04206	DOC_WW_Pin1_4	hsa04062	Chemokine signaling pathway
ELME000136	nsp07	Q05397	DOC_WW_Pin1_4	hsa04062	Chemokine signaling pathway
ELME000159	nsp07	Q05397	MOD_ProDKin_1	hsa04062	Chemokine signaling pathway
ELME000159	nsp07	Q07889	MOD_ProDKin_1	hsa04062	Chemokine signaling pathway
ELME000269	nsp02,nsp08	Q15653	DEG_SCF_TRCP1_1	hsa04062	Chemokine signaling pathway
ELME000289	nsp06	P05412	DEG_SCF_FBW7_1	hsa05231	Choline metabolism in cancer
ELME000136	nsp07	P05412	DOC_WW_Pin1_4	hsa05231	Choline metabolism in cancer
ELME000159	nsp07	P08047	MOD_ProDKin_1	hsa05231	Choline metabolism in cancer
ELME000005	N	P27986	LIG_SH3_1	hsa05231	Choline metabolism in cancer
ELME000136	nsp07	P31749	DOC_WW_Pin1_4	hsa05231	Choline metabolism in cancer
ELME000311	nsp09	P42768	LIG_Actin_WH2_1	hsa05231	Choline metabolism in cancer
ELME000441	nsp13	P42768	LIG_GBD_Chelix_1	hsa05231	Choline metabolism in cancer
ELME000159	nsp07	Q07889	MOD_ProDKin_1	hsa05231	Choline metabolism in cancer
ELME000159	nsp07	Q16665	MOD_ProDKin_1	hsa05231	Choline metabolism in cancer
ELME000311	nsp09	Q92558	LIG_Actin_WH2_1	hsa05231	Choline metabolism in cancer
ELME000311	nsp09	Q9Y6W5	LIG_Actin_WH2_1	hsa05231	Choline metabolism in cancer
ELME000269	nsp02,nsp08	P18848	DEG_SCF_TRCP1_1	hsa04725	Cholinergic synapse
ELME000005	N	P27986	LIG_SH3_1	hsa04725	Cholinergic synapse
ELME000136	nsp07	P31749	DOC_WW_Pin1_4	hsa04725	Cholinergic synapse
ELME000058	nsp02	Q14643	LIG_EVH1_2	hsa04725	Cholinergic synapse
ELME000106	nsp10	O00716	DOC_CyclinA_RxL_1	hsa05220	Chronic myeloid leukemia
ELME000442	nsp09	O14920	MOD_Plk_1	hsa05220	Chronic myeloid leukemia
ELME000289	nsp06	P01106	DEG_SCF_FBW7_1	hsa05220	Chronic myeloid leukemia
ELME000136	nsp07	P01106	DOC_WW_Pin1_4	hsa05220	Chronic myeloid leukemia
ELME000159	nsp07	P01106	MOD_ProDKin_1	hsa05220	Chronic myeloid leukemia
ELME000106	nsp10	P04637	DOC_CyclinA_RxL_1	hsa05220	Chronic myeloid leukemia
ELME000136	nsp07	P04637	DOC_WW_Pin1_4	hsa05220	Chronic myeloid leukemia
ELME000106	nsp10	P06400	DOC_CyclinA_RxL_1	hsa05220	Chronic myeloid leukemia
ELME000429	nsp10	P06400	MOD_CDK_SPK_2	hsa05220	Chronic myeloid leukemia
ELME000269	nsp02,nsp08	P19838	DEG_SCF_TRCP1_1	hsa05220	Chronic myeloid leukemia
ELME000007	nsp12	P24385	LIG_Rb_LxCxE_1	hsa05220	Chronic myeloid leukemia
ELME000269	nsp02,nsp08	P25963	DEG_SCF_TRCP1_1	hsa05220	Chronic myeloid leukemia
ELME000005	N	P27986	LIG_SH3_1	hsa05220	Chronic myeloid leukemia
ELME000136	nsp07	P31749	DOC_WW_Pin1_4	hsa05220	Chronic myeloid leukemia
ELME000106	nsp10	P38936	DOC_CyclinA_RxL_1	hsa05220	Chronic myeloid leukemia
ELME000140	nsp02	P38936	LIG_PCNA_PIPBox_1	hsa05220	Chronic myeloid leukemia
ELME000106	nsp10	P46527	DOC_CyclinA_RxL_1	hsa05220	Chronic myeloid leukemia
ELME000136	nsp07	P46527	DOC_WW_Pin1_4	hsa05220	Chronic myeloid leukemia
ELME000136	nsp07	P84022	DOC_WW_Pin1_4	hsa05220	Chronic myeloid leukemia
ELME000106	nsp10	Q01094	DOC_CyclinA_RxL_1	hsa05220	Chronic myeloid leukemia
ELME000136	nsp07	Q04206	DOC_WW_Pin1_4	hsa05220	Chronic myeloid leukemia
ELME000159	nsp07	Q07889	MOD_ProDKin_1	hsa05220	Chronic myeloid leukemia
ELME000007	nsp12	Q13547	LIG_Rb_LxCxE_1	hsa05220	Chronic myeloid leukemia
ELME000106	nsp10	Q14209	DOC_CyclinA_RxL_1	hsa05220	Chronic myeloid leukemia
ELME000058	nsp02	P21817	LIG_EVH1_2	hsa04713	Circadian entrainment
ELME000058	nsp02	Q14643	LIG_EVH1_2	hsa04713	Circadian entrainment
ELME000289	nsp06	P05412	DEG_SCF_FBW7_1	hsa05030	Cocaine addiction
ELME000136	nsp07	P05412	DOC_WW_Pin1_4	hsa05030	Cocaine addiction
ELME000269	nsp02,nsp08	P18848	DEG_SCF_TRCP1_1	hsa05030	Cocaine addiction
ELME000269	nsp02,nsp08	P19838	DEG_SCF_TRCP1_1	hsa05030	Cocaine addiction
ELME000136	nsp07	Q04206	DOC_WW_Pin1_4	hsa05030	Cocaine addiction
ELME000425	nsp04,N	O15169	DOC_PP2A_B56_1	hsa05210	Colorectal cancer
ELME000289	nsp06	P01106	DEG_SCF_FBW7_1	hsa05210	Colorectal cancer
ELME000136	nsp07	P01106	DOC_WW_Pin1_4	hsa05210	Colorectal cancer
ELME000159	nsp07	P01106	MOD_ProDKin_1	hsa05210	Colorectal cancer
ELME000106	nsp10	P04637	DOC_CyclinA_RxL_1	hsa05210	Colorectal cancer
ELME000136	nsp07	P04637	DOC_WW_Pin1_4	hsa05210	Colorectal cancer
ELME000289	nsp06	P05412	DEG_SCF_FBW7_1	hsa05210	Colorectal cancer
ELME000136	nsp07	P05412	DOC_WW_Pin1_4	hsa05210	Colorectal cancer
ELME000007	nsp12	P24385	LIG_Rb_LxCxE_1	hsa05210	Colorectal cancer
ELME000005	N	P27986	LIG_SH3_1	hsa05210	Colorectal cancer
ELME000136	nsp07	P31749	DOC_WW_Pin1_4	hsa05210	Colorectal cancer
ELME000269	nsp02,nsp08	P35222	DEG_SCF_TRCP1_1	hsa05210	Colorectal cancer
ELME000136	nsp07	P35222	DOC_WW_Pin1_4	hsa05210	Colorectal cancer
ELME000140	nsp02	P52701	LIG_PCNA_PIPBox_1	hsa05210	Colorectal cancer
ELME000429	nsp10	P55211	MOD_CDK_SPK_2	hsa05210	Colorectal cancer
ELME000461	nsp12	P55211	MOD_DYRK1A_RPxSP_1	hsa05210	Colorectal cancer
ELME000136	nsp07	P84022	DOC_WW_Pin1_4	hsa05210	Colorectal cancer
ELME000162	nsp06	P00749	MOD_OFUCOSY	hsa04610	Complement and coagulation cascades
ELME000162	nsp06	P00750	MOD_OFUCOSY	hsa04610	Complement and coagulation cascades
ELME000140	nsp02	P26358	LIG_PCNA_PIPBox_1	hsa00270	Cysteine and methionine metabolism
ELME000429	nsp10	P26358	MOD_CDK_SPK_2	hsa00270	Cysteine and methionine metabolism
ELME000269	nsp02,nsp08	P16471	DEG_SCF_TRCP1_1	hsa04060	Cytokine cytokine receptor interaction
ELME000269	nsp02,nsp08	P17181	DEG_SCF_TRCP1_1	hsa04060	Cytokine cytokine receptor interaction
ELME000117	nsp09	P20333	LIG_TRAF2_1	hsa04060	Cytokine cytokine receptor interaction
ELME000117	nsp09	P25942	LIG_TRAF2_1	hsa04060	Cytokine cytokine receptor interaction
ELME000133	nsp04,nsp07	P25942	LIG_TRAF6	hsa04060	Cytokine cytokine receptor interaction
ELME000117	nsp09	P26842	LIG_TRAF2_1	hsa04060	Cytokine cytokine receptor interaction
ELME000117	nsp09	P28908	LIG_TRAF2_1	hsa04060	Cytokine cytokine receptor interaction
ELME000117	nsp09	P36941	LIG_TRAF2_1	hsa04060	Cytokine cytokine receptor interaction
ELME000163	nsp06	P40189	LIG_SH2_STAT3	hsa04060	Cytokine cytokine receptor interaction
ELME000163	nsp06	P40238	LIG_SH2_STAT3	hsa04060	Cytokine cytokine receptor interaction
ELME000117	nsp09	P43489	LIG_TRAF2_1	hsa04060	Cytokine cytokine receptor interaction
ELME000117	nsp09	Q07011	LIG_TRAF2_1	hsa04060	Cytokine cytokine receptor interaction
ELME000163	nsp06	Q99062	LIG_SH2_STAT3	hsa04060	Cytokine cytokine receptor interaction
ELME000133	nsp04,nsp07	Q9Y6Q6	LIG_TRAF6	hsa04060	Cytokine cytokine receptor interaction
ELME000442	nsp09	O14920	MOD_Plk_1	hsa04623	Cytosolic DNA sensing pathway
ELME000269	nsp02,nsp08	P19838	DEG_SCF_TRCP1_1	hsa04623	Cytosolic DNA sensing pathway
ELME000269	nsp02,nsp08	P25963	DEG_SCF_TRCP1_1	hsa04623	Cytosolic DNA sensing pathway
ELME000136	nsp07	Q04206	DOC_WW_Pin1_4	hsa04623	Cytosolic DNA sensing pathway
ELME000136	nsp07	Q14653	DOC_WW_Pin1_4	hsa04623	Cytosolic DNA sensing pathway
ELME000269	nsp02,nsp08	Q15653	DEG_SCF_TRCP1_1	hsa04623	Cytosolic DNA sensing pathway
ELME000155	nsp15	Q14118	LIG_SH3_3	hsa05414	Dilated cardiomyopathy
ELME000140	nsp02	P18858	LIG_PCNA_PIPBox_1	hsa03030	DNA replication
ELME000007	nsp12	P35251	LIG_Rb_LxCxE_1	hsa03030	DNA replication
ELME000140	nsp02	P39748	LIG_PCNA_PIPBox_1	hsa03030	DNA replication
ELME000140	nsp02	Q15054	LIG_PCNA_PIPBox_1	hsa03030	DNA replication
ELME000269	nsp02,nsp08	P18848	DEG_SCF_TRCP1_1	hsa04728	Dopaminergic synapse
ELME000136	nsp07	P31749	DOC_WW_Pin1_4	hsa04728	Dopaminergic synapse
ELME000058	nsp02	Q14643	LIG_EVH1_2	hsa04728	Dopaminergic synapse
ELME000159	nsp07	P41212	MOD_ProDKin_1	hsa04320	Dorso ventral axis formation
ELME000292	nsp04	P46531	DEG_SCF_FBW7_2	hsa04320	Dorso ventral axis formation
ELME000136	nsp07	P46531	DOC_WW_Pin1_4	hsa04320	Dorso ventral axis formation
ELME000159	nsp07	Q07889	MOD_ProDKin_1	hsa04320	Dorso ventral axis formation
ELME000155	nsp15	Q14118	LIG_SH3_3	hsa04512	ECM receptor interaction
ELME000311	nsp09	O43516	LIG_Actin_WH2_1	hsa04144	Endocytosis
ELME000136	nsp07	P29590	DOC_WW_Pin1_4	hsa04144	Endocytosis
ELME000335	nsp10	P29590	LIG_SUMO_SIM_anti_2	hsa04144	Endocytosis
ELME000311	nsp09	P42768	LIG_Actin_WH2_1	hsa04144	Endocytosis
ELME000441	nsp13	P42768	LIG_GBD_Chelix_1	hsa04144	Endocytosis
ELME000461	nsp12	P49418	MOD_DYRK1A_RPxSP_1	hsa04144	Endocytosis
ELME000136	nsp07	P84022	DOC_WW_Pin1_4	hsa04144	Endocytosis
ELME000425	nsp04,N	O15169	DOC_PP2A_B56_1	hsa05213	Endometrial cancer
ELME000425	nsp04,N	O43524	DOC_PP2A_B56_1	hsa05213	Endometrial cancer
ELME000289	nsp06	P01106	DEG_SCF_FBW7_1	hsa05213	Endometrial cancer
ELME000136	nsp07	P01106	DOC_WW_Pin1_4	hsa05213	Endometrial cancer
ELME000159	nsp07	P01106	MOD_ProDKin_1	hsa05213	Endometrial cancer
ELME000106	nsp10	P04637	DOC_CyclinA_RxL_1	hsa05213	Endometrial cancer
ELME000136	nsp07	P04637	DOC_WW_Pin1_4	hsa05213	Endometrial cancer
ELME000007	nsp12	P24385	LIG_Rb_LxCxE_1	hsa05213	Endometrial cancer
ELME000005	N	P27986	LIG_SH3_1	hsa05213	Endometrial cancer
ELME000136	nsp07	P31749	DOC_WW_Pin1_4	hsa05213	Endometrial cancer
ELME000269	nsp02,nsp08	P35222	DEG_SCF_TRCP1_1	hsa05213	Endometrial cancer
ELME000136	nsp07	P35222	DOC_WW_Pin1_4	hsa05213	Endometrial cancer
ELME000429	nsp10	P55211	MOD_CDK_SPK_2	hsa05213	Endometrial cancer
ELME000461	nsp12	P55211	MOD_DYRK1A_RPxSP_1	hsa05213	Endometrial cancer
ELME000159	nsp07	Q07889	MOD_ProDKin_1	hsa05213	Endometrial cancer
ELME000442	nsp09	O14920	MOD_Plk_1	hsa05120	Epithelial cell signaling in Helicobacter pylori infection
ELME000289	nsp06	P05412	DEG_SCF_FBW7_1	hsa05120	Epithelial cell signaling in Helicobacter pylori infection
ELME000136	nsp07	P05412	DOC_WW_Pin1_4	hsa05120	Epithelial cell signaling in Helicobacter pylori infection
ELME000269	nsp02,nsp08	P19838	DEG_SCF_TRCP1_1	hsa05120	Epithelial cell signaling in Helicobacter pylori infection
ELME000269	nsp02,nsp08	P25963	DEG_SCF_TRCP1_1	hsa05120	Epithelial cell signaling in Helicobacter pylori infection
ELME000432	nsp09	P45985	DOC_MAPK_MEF2A_6	hsa05120	Epithelial cell signaling in Helicobacter pylori infection
ELME000136	nsp07	Q04206	DOC_WW_Pin1_4	hsa05120	Epithelial cell signaling in Helicobacter pylori infection
ELME000269	nsp02,nsp08	O00221	DEG_SCF_TRCP1_1	hsa05169	Epstein Barr virus infection
ELME000442	nsp09	O14920	MOD_Plk_1	hsa05169	Epstein Barr virus infection
ELME000289	nsp06	P01106	DEG_SCF_FBW7_1	hsa05169	Epstein Barr virus infection
ELME000136	nsp07	P01106	DOC_WW_Pin1_4	hsa05169	Epstein Barr virus infection
ELME000159	nsp07	P01106	MOD_ProDKin_1	hsa05169	Epstein Barr virus infection
ELME000106	nsp10	P04637	DOC_CyclinA_RxL_1	hsa05169	Epstein Barr virus infection
ELME000136	nsp07	P04637	DOC_WW_Pin1_4	hsa05169	Epstein Barr virus infection
ELME000289	nsp06	P05412	DEG_SCF_FBW7_1	hsa05169	Epstein Barr virus infection
ELME000136	nsp07	P05412	DOC_WW_Pin1_4	hsa05169	Epstein Barr virus infection
ELME000106	nsp10	P06400	DOC_CyclinA_RxL_1	hsa05169	Epstein Barr virus infection
ELME000429	nsp10	P06400	MOD_CDK_SPK_2	hsa05169	Epstein Barr virus infection
ELME000269	nsp02,nsp08	P19838	DEG_SCF_TRCP1_1	hsa05169	Epstein Barr virus infection
ELME000117	nsp09	P25942	LIG_TRAF2_1	hsa05169	Epstein Barr virus infection
ELME000133	nsp04,nsp07	P25942	LIG_TRAF6	hsa05169	Epstein Barr virus infection
ELME000269	nsp02,nsp08	P25963	DEG_SCF_TRCP1_1	hsa05169	Epstein Barr virus infection
ELME000005	N	P27986	LIG_SH3_1	hsa05169	Epstein Barr virus infection
ELME000136	nsp07	P31749	DOC_WW_Pin1_4	hsa05169	Epstein Barr virus infection
ELME000106	nsp10	P38936	DOC_CyclinA_RxL_1	hsa05169	Epstein Barr virus infection
ELME000140	nsp02	P38936	LIG_PCNA_PIPBox_1	hsa05169	Epstein Barr virus infection
ELME000136	nsp07	P40763	DOC_WW_Pin1_4	hsa05169	Epstein Barr virus infection
ELME000432	nsp09	P45985	DOC_MAPK_MEF2A_6	hsa05169	Epstein Barr virus infection
ELME000106	nsp10	P46527	DOC_CyclinA_RxL_1	hsa05169	Epstein Barr virus infection
ELME000136	nsp07	P46527	DOC_WW_Pin1_4	hsa05169	Epstein Barr virus infection
ELME000133	nsp04,nsp07	P51617	LIG_TRAF6	hsa05169	Epstein Barr virus infection
ELME000136	nsp07	Q04206	DOC_WW_Pin1_4	hsa05169	Epstein Barr virus infection
ELME000007	nsp12	Q13547	LIG_Rb_LxCxE_1	hsa05169	Epstein Barr virus infection
ELME000136	nsp07	Q14653	DOC_WW_Pin1_4	hsa05169	Epstein Barr virus infection
ELME000269	nsp02,nsp08	Q15653	DEG_SCF_TRCP1_1	hsa05169	Epstein Barr virus infection
ELME000045	nsp09	Q92793	LIG_NRBOX	hsa05169	Epstein Barr virus infection
ELME000136	nsp07	Q9Y618	DOC_WW_Pin1_4	hsa05169	Epstein Barr virus infection
ELME000289	nsp06	P01106	DEG_SCF_FBW7_1	hsa04012	ErbB signaling pathway
ELME000136	nsp07	P01106	DOC_WW_Pin1_4	hsa04012	ErbB signaling pathway
ELME000159	nsp07	P01106	MOD_ProDKin_1	hsa04012	ErbB signaling pathway
ELME000289	nsp06	P05412	DEG_SCF_FBW7_1	hsa04012	ErbB signaling pathway
ELME000136	nsp07	P05412	DOC_WW_Pin1_4	hsa04012	ErbB signaling pathway
ELME000005	N	P27986	LIG_SH3_1	hsa04012	ErbB signaling pathway
ELME000136	nsp07	P31749	DOC_WW_Pin1_4	hsa04012	ErbB signaling pathway
ELME000106	nsp10	P38936	DOC_CyclinA_RxL_1	hsa04012	ErbB signaling pathway
ELME000140	nsp02	P38936	LIG_PCNA_PIPBox_1	hsa04012	ErbB signaling pathway
ELME000432	nsp09	P45985	DOC_MAPK_MEF2A_6	hsa04012	ErbB signaling pathway
ELME000106	nsp10	P46527	DOC_CyclinA_RxL_1	hsa04012	ErbB signaling pathway
ELME000136	nsp07	P46527	DOC_WW_Pin1_4	hsa04012	ErbB signaling pathway
ELME000136	nsp07	Q05397	DOC_WW_Pin1_4	hsa04012	ErbB signaling pathway
ELME000159	nsp07	Q05397	MOD_ProDKin_1	hsa04012	ErbB signaling pathway
ELME000159	nsp07	Q07889	MOD_ProDKin_1	hsa04012	ErbB signaling pathway
ELME000289	nsp06	P05412	DEG_SCF_FBW7_1	hsa04915	Estrogen signaling pathway
ELME000136	nsp07	P05412	DOC_WW_Pin1_4	hsa04915	Estrogen signaling pathway
ELME000159	nsp07	P08047	MOD_ProDKin_1	hsa04915	Estrogen signaling pathway
ELME000269	nsp02,nsp08	P18848	DEG_SCF_TRCP1_1	hsa04915	Estrogen signaling pathway
ELME000005	N	P27986	LIG_SH3_1	hsa04915	Estrogen signaling pathway
ELME000136	nsp07	P31749	DOC_WW_Pin1_4	hsa04915	Estrogen signaling pathway
ELME000159	nsp07	Q07889	MOD_ProDKin_1	hsa04915	Estrogen signaling pathway
ELME000058	nsp02	Q13255	LIG_EVH1_2	hsa04915	Estrogen signaling pathway
ELME000058	nsp02	Q14643	LIG_EVH1_2	hsa04915	Estrogen signaling pathway
ELME000460	nsp02	P54132	LIG_MLH1_MIPbox_1	hsa03460	Fanconi anemia pathway
ELME000005	N	Q06609	LIG_SH3_1	hsa03460	Fanconi anemia pathway
ELME000005	N	P27986	LIG_SH3_1	hsa04664	Fc epsilon RI signaling pathway
ELME000136	nsp07	P31749	DOC_WW_Pin1_4	hsa04664	Fc epsilon RI signaling pathway
ELME000432	nsp09	P45985	DOC_MAPK_MEF2A_6	hsa04664	Fc epsilon RI signaling pathway
ELME000005	N	Q06187	LIG_SH3_1	hsa04664	Fc epsilon RI signaling pathway
ELME000159	nsp07	Q07889	MOD_ProDKin_1	hsa04664	Fc epsilon RI signaling pathway
ELME000136	nsp07	P14598	DOC_WW_Pin1_4	hsa04666	Fc gamma R mediated phagocytosis
ELME000005	N	P27986	LIG_SH3_1	hsa04666	Fc gamma R mediated phagocytosis
ELME000136	nsp07	P31749	DOC_WW_Pin1_4	hsa04666	Fc gamma R mediated phagocytosis
ELME000311	nsp09	P42768	LIG_Actin_WH2_1	hsa04666	Fc gamma R mediated phagocytosis
ELME000441	nsp13	P42768	LIG_GBD_Chelix_1	hsa04666	Fc gamma R mediated phagocytosis
ELME000461	nsp12	P49418	MOD_DYRK1A_RPxSP_1	hsa04666	Fc gamma R mediated phagocytosis
ELME000311	nsp09	Q92558	LIG_Actin_WH2_1	hsa04666	Fc gamma R mediated phagocytosis
ELME000311	nsp09	Q9Y6W5	LIG_Actin_WH2_1	hsa04666	Fc gamma R mediated phagocytosis
ELME000289	nsp06	P05412	DEG_SCF_FBW7_1	hsa04510	Focal adhesion
ELME000136	nsp07	P05412	DOC_WW_Pin1_4	hsa04510	Focal adhesion
ELME000007	nsp12	P24385	LIG_Rb_LxCxE_1	hsa04510	Focal adhesion
ELME000005	N	P27986	LIG_SH3_1	hsa04510	Focal adhesion
ELME000136	nsp07	P31749	DOC_WW_Pin1_4	hsa04510	Focal adhesion
ELME000269	nsp02,nsp08	P35222	DEG_SCF_TRCP1_1	hsa04510	Focal adhesion
ELME000136	nsp07	P35222	DOC_WW_Pin1_4	hsa04510	Focal adhesion
ELME000136	nsp07	Q05397	DOC_WW_Pin1_4	hsa04510	Focal adhesion
ELME000159	nsp07	Q05397	MOD_ProDKin_1	hsa04510	Focal adhesion
ELME000159	nsp07	Q07889	MOD_ProDKin_1	hsa04510	Focal adhesion
ELME000442	nsp09	O14920	MOD_Plk_1	hsa04068	FoxO signaling pathway
ELME000425	nsp04,N	O43524	DOC_PP2A_B56_1	hsa04068	FoxO signaling pathway
ELME000007	nsp12	P24385	LIG_Rb_LxCxE_1	hsa04068	FoxO signaling pathway
ELME000005	N	P27986	LIG_SH3_1	hsa04068	FoxO signaling pathway
ELME000136	nsp07	P31749	DOC_WW_Pin1_4	hsa04068	FoxO signaling pathway
ELME000136	nsp07	P35568	DOC_WW_Pin1_4	hsa04068	FoxO signaling pathway
ELME000106	nsp10	P38936	DOC_CyclinA_RxL_1	hsa04068	FoxO signaling pathway
ELME000140	nsp02	P38936	LIG_PCNA_PIPBox_1	hsa04068	FoxO signaling pathway
ELME000136	nsp07	P40763	DOC_WW_Pin1_4	hsa04068	FoxO signaling pathway
ELME000106	nsp10	P46527	DOC_CyclinA_RxL_1	hsa04068	FoxO signaling pathway
ELME000136	nsp07	P46527	DOC_WW_Pin1_4	hsa04068	FoxO signaling pathway
ELME000136	nsp07	P84022	DOC_WW_Pin1_4	hsa04068	FoxO signaling pathway
ELME000159	nsp07	Q07889	MOD_ProDKin_1	hsa04068	FoxO signaling pathway
ELME000106	nsp10	Q08999	DOC_CyclinA_RxL_1	hsa04068	FoxO signaling pathway
ELME000058	nsp02	Q13255	LIG_EVH1_2	hsa04068	FoxO signaling pathway
ELME000045	nsp09	Q92793	LIG_NRBOX	hsa04068	FoxO signaling pathway
ELME000159	nsp07	Q07889	MOD_ProDKin_1	hsa04540	Gap junction
ELME000058	nsp02	Q13255	LIG_EVH1_2	hsa04540	Gap junction
ELME000058	nsp02	Q14643	LIG_EVH1_2	hsa04540	Gap junction
ELME000058	nsp02	Q14643	LIG_EVH1_2	hsa04971	Gastric acid secretion
ELME000106	nsp10	O00716	DOC_CyclinA_RxL_1	hsa05214	Glioma
ELME000106	nsp10	P04637	DOC_CyclinA_RxL_1	hsa05214	Glioma
ELME000136	nsp07	P04637	DOC_WW_Pin1_4	hsa05214	Glioma
ELME000106	nsp10	P06400	DOC_CyclinA_RxL_1	hsa05214	Glioma
ELME000429	nsp10	P06400	MOD_CDK_SPK_2	hsa05214	Glioma
ELME000007	nsp12	P24385	LIG_Rb_LxCxE_1	hsa05214	Glioma
ELME000005	N	P27986	LIG_SH3_1	hsa05214	Glioma
ELME000136	nsp07	P31749	DOC_WW_Pin1_4	hsa05214	Glioma
ELME000106	nsp10	P38936	DOC_CyclinA_RxL_1	hsa05214	Glioma
ELME000140	nsp02	P38936	LIG_PCNA_PIPBox_1	hsa05214	Glioma
ELME000106	nsp10	Q01094	DOC_CyclinA_RxL_1	hsa05214	Glioma
ELME000159	nsp07	Q07889	MOD_ProDKin_1	hsa05214	Glioma
ELME000106	nsp10	Q14209	DOC_CyclinA_RxL_1	hsa05214	Glioma
ELME000269	nsp02,nsp08	P18848	DEG_SCF_TRCP1_1	hsa04922	Glucagon signaling pathway
ELME000136	nsp07	P31749	DOC_WW_Pin1_4	hsa04922	Glucagon signaling pathway
ELME000058	nsp02	Q14643	LIG_EVH1_2	hsa04922	Glucagon signaling pathway
ELME000045	nsp09	Q92793	LIG_NRBOX	hsa04922	Glucagon signaling pathway
ELME000045	nsp09	Q9UBK2	LIG_NRBOX	hsa04922	Glucagon signaling pathway
ELME000058	nsp02	Q13255	LIG_EVH1_2	hsa04724	Glutamatergic synapse
ELME000058	nsp02	Q14643	LIG_EVH1_2	hsa04724	Glutamatergic synapse
ELME000289	nsp06	P05412	DEG_SCF_FBW7_1	hsa04912	GnRH signaling pathway
ELME000136	nsp07	P05412	DOC_WW_Pin1_4	hsa04912	GnRH signaling pathway
ELME000269	nsp02,nsp08	P18848	DEG_SCF_TRCP1_1	hsa04912	GnRH signaling pathway
ELME000432	nsp09	P45985	DOC_MAPK_MEF2A_6	hsa04912	GnRH signaling pathway
ELME000159	nsp07	Q07889	MOD_ProDKin_1	hsa04912	GnRH signaling pathway
ELME000058	nsp02	Q14643	LIG_EVH1_2	hsa04912	GnRH signaling pathway
ELME000103	nsp03	P12644	CLV_PCSK_PC7_1	hsa04340	Hedgehog signaling pathway
ELME000155	nsp15	P06729	LIG_SH3_3	hsa04640	Hematopoietic cell lineage
ELME000163	nsp06	Q99062	LIG_SH2_STAT3	hsa04640	Hematopoietic cell lineage
ELME000106	nsp10	O00716	DOC_CyclinA_RxL_1	hsa05161	Hepatitis B
ELME000442	nsp09	O14920	MOD_Plk_1	hsa05161	Hepatitis B
ELME000237	N	O95644	DOC_PP2B_PxIxI_1	hsa05161	Hepatitis B
ELME000461	nsp12	O95644	MOD_DYRK1A_RPxSP_1	hsa05161	Hepatitis B
ELME000289	nsp06	P01106	DEG_SCF_FBW7_1	hsa05161	Hepatitis B
ELME000136	nsp07	P01106	DOC_WW_Pin1_4	hsa05161	Hepatitis B
ELME000159	nsp07	P01106	MOD_ProDKin_1	hsa05161	Hepatitis B
ELME000106	nsp10	P04637	DOC_CyclinA_RxL_1	hsa05161	Hepatitis B
ELME000136	nsp07	P04637	DOC_WW_Pin1_4	hsa05161	Hepatitis B
ELME000289	nsp06	P05412	DEG_SCF_FBW7_1	hsa05161	Hepatitis B
ELME000136	nsp07	P05412	DOC_WW_Pin1_4	hsa05161	Hepatitis B
ELME000106	nsp10	P06400	DOC_CyclinA_RxL_1	hsa05161	Hepatitis B
ELME000429	nsp10	P06400	MOD_CDK_SPK_2	hsa05161	Hepatitis B
ELME000269	nsp02,nsp08	P17181	DEG_SCF_TRCP1_1	hsa05161	Hepatitis B
ELME000269	nsp02,nsp08	P18848	DEG_SCF_TRCP1_1	hsa05161	Hepatitis B
ELME000269	nsp02,nsp08	P19838	DEG_SCF_TRCP1_1	hsa05161	Hepatitis B
ELME000007	nsp12	P24385	LIG_Rb_LxCxE_1	hsa05161	Hepatitis B
ELME000289	nsp06	P24864	DEG_SCF_FBW7_1	hsa05161	Hepatitis B
ELME000269	nsp02,nsp08	P25963	DEG_SCF_TRCP1_1	hsa05161	Hepatitis B
ELME000005	N	P27986	LIG_SH3_1	hsa05161	Hepatitis B
ELME000136	nsp07	P31749	DOC_WW_Pin1_4	hsa05161	Hepatitis B
ELME000106	nsp10	P38936	DOC_CyclinA_RxL_1	hsa05161	Hepatitis B
ELME000140	nsp02	P38936	LIG_PCNA_PIPBox_1	hsa05161	Hepatitis B
ELME000136	nsp07	P40763	DOC_WW_Pin1_4	hsa05161	Hepatitis B
ELME000432	nsp09	P45985	DOC_MAPK_MEF2A_6	hsa05161	Hepatitis B
ELME000106	nsp10	P46527	DOC_CyclinA_RxL_1	hsa05161	Hepatitis B
ELME000136	nsp07	P46527	DOC_WW_Pin1_4	hsa05161	Hepatitis B
ELME000429	nsp10	P55211	MOD_CDK_SPK_2	hsa05161	Hepatitis B
ELME000461	nsp12	P55211	MOD_DYRK1A_RPxSP_1	hsa05161	Hepatitis B
ELME000136	nsp07	P84022	DOC_WW_Pin1_4	hsa05161	Hepatitis B
ELME000106	nsp10	Q01094	DOC_CyclinA_RxL_1	hsa05161	Hepatitis B
ELME000136	nsp07	Q04206	DOC_WW_Pin1_4	hsa05161	Hepatitis B
ELME000106	nsp10	Q14209	DOC_CyclinA_RxL_1	hsa05161	Hepatitis B
ELME000136	nsp07	Q14653	DOC_WW_Pin1_4	hsa05161	Hepatitis B
ELME000159	nsp07	Q14934	MOD_ProDKin_1	hsa05161	Hepatitis B
ELME000045	nsp09	Q92793	LIG_NRBOX	hsa05161	Hepatitis B
ELME000442	nsp09	O14920	MOD_Plk_1	hsa05160	Hepatitis C
ELME000106	nsp10	P04637	DOC_CyclinA_RxL_1	hsa05160	Hepatitis C
ELME000136	nsp07	P04637	DOC_WW_Pin1_4	hsa05160	Hepatitis C
ELME000269	nsp02,nsp08	P17181	DEG_SCF_TRCP1_1	hsa05160	Hepatitis C
ELME000269	nsp02,nsp08	P19838	DEG_SCF_TRCP1_1	hsa05160	Hepatitis C
ELME000269	nsp02,nsp08	P25963	DEG_SCF_TRCP1_1	hsa05160	Hepatitis C
ELME000005	N	P27986	LIG_SH3_1	hsa05160	Hepatitis C
ELME000136	nsp07	P31749	DOC_WW_Pin1_4	hsa05160	Hepatitis C
ELME000106	nsp10	P38936	DOC_CyclinA_RxL_1	hsa05160	Hepatitis C
ELME000140	nsp02	P38936	LIG_PCNA_PIPBox_1	hsa05160	Hepatitis C
ELME000136	nsp07	P40763	DOC_WW_Pin1_4	hsa05160	Hepatitis C
ELME000136	nsp07	Q04206	DOC_WW_Pin1_4	hsa05160	Hepatitis C
ELME000159	nsp07	Q07889	MOD_ProDKin_1	hsa05160	Hepatitis C
ELME000136	nsp07	Q14653	DOC_WW_Pin1_4	hsa05160	Hepatitis C
ELME000442	nsp09	O14920	MOD_Plk_1	hsa05168	Herpes simplex infection
ELME000106	nsp10	P04637	DOC_CyclinA_RxL_1	hsa05168	Herpes simplex infection
ELME000136	nsp07	P04637	DOC_WW_Pin1_4	hsa05168	Herpes simplex infection
ELME000289	nsp06	P05412	DEG_SCF_FBW7_1	hsa05168	Herpes simplex infection
ELME000136	nsp07	P05412	DOC_WW_Pin1_4	hsa05168	Herpes simplex infection
ELME000269	nsp02,nsp08	P17181	DEG_SCF_TRCP1_1	hsa05168	Herpes simplex infection
ELME000269	nsp02,nsp08	P19838	DEG_SCF_TRCP1_1	hsa05168	Herpes simplex infection
ELME000335	nsp10	P23497	LIG_SUMO_SIM_anti_2	hsa05168	Herpes simplex infection
ELME000269	nsp02,nsp08	P25963	DEG_SCF_TRCP1_1	hsa05168	Herpes simplex infection
ELME000136	nsp07	P29590	DOC_WW_Pin1_4	hsa05168	Herpes simplex infection
ELME000335	nsp10	P29590	LIG_SUMO_SIM_anti_2	hsa05168	Herpes simplex infection
ELME000136	nsp07	Q04206	DOC_WW_Pin1_4	hsa05168	Herpes simplex infection
ELME000136	nsp07	Q14653	DOC_WW_Pin1_4	hsa05168	Herpes simplex infection
ELME000269	nsp02,nsp08	Q15653	DEG_SCF_TRCP1_1	hsa05168	Herpes simplex infection
ELME000045	nsp09	Q92793	LIG_NRBOX	hsa05168	Herpes simplex infection
ELME000136	nsp07	Q9UER7	DOC_WW_Pin1_4	hsa05168	Herpes simplex infection
ELME000335	nsp10	Q9UER7	LIG_SUMO_SIM_anti_2	hsa05168	Herpes simplex infection
ELME000269	nsp02,nsp08	P19838	DEG_SCF_TRCP1_1	hsa04066	HIF 1 signaling pathway
ELME000005	N	P27986	LIG_SH3_1	hsa04066	HIF 1 signaling pathway
ELME000136	nsp07	P31749	DOC_WW_Pin1_4	hsa04066	HIF 1 signaling pathway
ELME000117	nsp09	P36941	LIG_TRAF2_1	hsa04066	HIF 1 signaling pathway
ELME000106	nsp10	P38936	DOC_CyclinA_RxL_1	hsa04066	HIF 1 signaling pathway
ELME000140	nsp02	P38936	LIG_PCNA_PIPBox_1	hsa04066	HIF 1 signaling pathway
ELME000136	nsp07	P40763	DOC_WW_Pin1_4	hsa04066	HIF 1 signaling pathway
ELME000106	nsp10	P46527	DOC_CyclinA_RxL_1	hsa04066	HIF 1 signaling pathway
ELME000136	nsp07	P46527	DOC_WW_Pin1_4	hsa04066	HIF 1 signaling pathway
ELME000136	nsp07	Q04206	DOC_WW_Pin1_4	hsa04066	HIF 1 signaling pathway
ELME000159	nsp07	Q16665	MOD_ProDKin_1	hsa04066	HIF 1 signaling pathway
ELME000045	nsp09	Q92793	LIG_NRBOX	hsa04066	HIF 1 signaling pathway
ELME000425	nsp04,N	O15169	DOC_PP2A_B56_1	hsa04390	Hippo signaling pathway
ELME000136	nsp07	O15350	DOC_WW_Pin1_4	hsa04390	Hippo signaling pathway
ELME000155	nsp15	O15350	LIG_SH3_3	hsa04390	Hippo signaling pathway
ELME000289	nsp06	P01106	DEG_SCF_FBW7_1	hsa04390	Hippo signaling pathway
ELME000136	nsp07	P01106	DOC_WW_Pin1_4	hsa04390	Hippo signaling pathway
ELME000159	nsp07	P01106	MOD_ProDKin_1	hsa04390	Hippo signaling pathway
ELME000103	nsp03	P12644	CLV_PCSK_PC7_1	hsa04390	Hippo signaling pathway
ELME000007	nsp12	P24385	LIG_Rb_LxCxE_1	hsa04390	Hippo signaling pathway
ELME000269	nsp02,nsp08	P35222	DEG_SCF_TRCP1_1	hsa04390	Hippo signaling pathway
ELME000136	nsp07	P35222	DOC_WW_Pin1_4	hsa04390	Hippo signaling pathway
ELME000136	nsp07	P84022	DOC_WW_Pin1_4	hsa04390	Hippo signaling pathway
ELME000461	nsp12	Q02363	MOD_DYRK1A_RPxSP_1	hsa04390	Hippo signaling pathway
ELME000269	nsp02,nsp08	Q12959	DEG_SCF_TRCP1_1	hsa04390	Hippo signaling pathway
ELME000460	nsp02	P54132	LIG_MLH1_MIPbox_1	hsa03440	Homologous recombination
ELME000005	N	Q06609	LIG_SH3_1	hsa03440	Homologous recombination
ELME000140	nsp02	Q15054	LIG_PCNA_PIPBox_1	hsa03440	Homologous recombination
ELME000106	nsp10	O00716	DOC_CyclinA_RxL_1	hsa05166	HTLV I infection
ELME000442	nsp09	O14920	MOD_Plk_1	hsa05166	HTLV I infection
ELME000425	nsp04,N	O60566	DOC_PP2A_B56_1	hsa05166	HTLV I infection
ELME000237	N	O95644	DOC_PP2B_PxIxI_1	hsa05166	HTLV I infection
ELME000461	nsp12	O95644	MOD_DYRK1A_RPxSP_1	hsa05166	HTLV I infection
ELME000425	nsp04,N	O96017	DOC_PP2A_B56_1	hsa05166	HTLV I infection
ELME000289	nsp06	P01106	DEG_SCF_FBW7_1	hsa05166	HTLV I infection
ELME000136	nsp07	P01106	DOC_WW_Pin1_4	hsa05166	HTLV I infection
ELME000159	nsp07	P01106	MOD_ProDKin_1	hsa05166	HTLV I infection
ELME000106	nsp10	P04637	DOC_CyclinA_RxL_1	hsa05166	HTLV I infection
ELME000136	nsp07	P04637	DOC_WW_Pin1_4	hsa05166	HTLV I infection
ELME000289	nsp06	P05412	DEG_SCF_FBW7_1	hsa05166	HTLV I infection
ELME000136	nsp07	P05412	DOC_WW_Pin1_4	hsa05166	HTLV I infection
ELME000106	nsp10	P06400	DOC_CyclinA_RxL_1	hsa05166	HTLV I infection
ELME000429	nsp10	P06400	MOD_CDK_SPK_2	hsa05166	HTLV I infection
ELME000269	nsp02,nsp08	P18848	DEG_SCF_TRCP1_1	hsa05166	HTLV I infection
ELME000269	nsp02,nsp08	P19838	DEG_SCF_TRCP1_1	hsa05166	HTLV I infection
ELME000007	nsp12	P24385	LIG_Rb_LxCxE_1	hsa05166	HTLV I infection
ELME000117	nsp09	P25942	LIG_TRAF2_1	hsa05166	HTLV I infection
ELME000133	nsp04,nsp07	P25942	LIG_TRAF6	hsa05166	HTLV I infection
ELME000269	nsp02,nsp08	P25963	DEG_SCF_TRCP1_1	hsa05166	HTLV I infection
ELME000005	N	P27986	LIG_SH3_1	hsa05166	HTLV I infection
ELME000159	nsp07	P28324	MOD_ProDKin_1	hsa05166	HTLV I infection
ELME000136	nsp07	P31749	DOC_WW_Pin1_4	hsa05166	HTLV I infection
ELME000269	nsp02,nsp08	P35222	DEG_SCF_TRCP1_1	hsa05166	HTLV I infection
ELME000136	nsp07	P35222	DOC_WW_Pin1_4	hsa05166	HTLV I infection
ELME000117	nsp09	P36941	LIG_TRAF2_1	hsa05166	HTLV I infection
ELME000106	nsp10	P38936	DOC_CyclinA_RxL_1	hsa05166	HTLV I infection
ELME000140	nsp02	P38936	LIG_PCNA_PIPBox_1	hsa05166	HTLV I infection
ELME000432	nsp09	P45985	DOC_MAPK_MEF2A_6	hsa05166	HTLV I infection
ELME000136	nsp07	P84022	DOC_WW_Pin1_4	hsa05166	HTLV I infection
ELME000106	nsp10	Q01094	DOC_CyclinA_RxL_1	hsa05166	HTLV I infection
ELME000136	nsp07	Q04206	DOC_WW_Pin1_4	hsa05166	HTLV I infection
ELME000269	nsp02,nsp08	Q12959	DEG_SCF_TRCP1_1	hsa05166	HTLV I infection
ELME000106	nsp10	Q14209	DOC_CyclinA_RxL_1	hsa05166	HTLV I infection
ELME000159	nsp07	Q14934	MOD_ProDKin_1	hsa05166	HTLV I infection
ELME000140	nsp02	Q15054	LIG_PCNA_PIPBox_1	hsa05166	HTLV I infection
ELME000045	nsp09	Q92793	LIG_NRBOX	hsa05166	HTLV I infection
ELME000106	nsp10	P04637	DOC_CyclinA_RxL_1	hsa05016	Huntington's disease
ELME000136	nsp07	P04637	DOC_WW_Pin1_4	hsa05016	Huntington's disease
ELME000159	nsp07	P08047	MOD_ProDKin_1	hsa05016	Huntington's disease
ELME000429	nsp10	P55211	MOD_CDK_SPK_2	hsa05016	Huntington's disease
ELME000461	nsp12	P55211	MOD_DYRK1A_RPxSP_1	hsa05016	Huntington's disease
ELME000007	nsp12	Q13547	LIG_Rb_LxCxE_1	hsa05016	Huntington's disease
ELME000058	nsp02	Q14643	LIG_EVH1_2	hsa05016	Huntington's disease
ELME000045	nsp09	Q92793	LIG_NRBOX	hsa05016	Huntington's disease
ELME000045	nsp09	Q9UBK2	LIG_NRBOX	hsa05016	Huntington's disease
ELME000155	nsp15	Q14118	LIG_SH3_3	hsa05410	Hypertrophic cardiomyopathy (HCM)
ELME000237	N	O95644	DOC_PP2B_PxIxI_1	hsa05321	Inflammatory bowel disease (IBD)
ELME000461	nsp12	O95644	MOD_DYRK1A_RPxSP_1	hsa05321	Inflammatory bowel disease (IBD)
ELME000289	nsp06	P05412	DEG_SCF_FBW7_1	hsa05321	Inflammatory bowel disease (IBD)
ELME000136	nsp07	P05412	DOC_WW_Pin1_4	hsa05321	Inflammatory bowel disease (IBD)
ELME000269	nsp02,nsp08	P19838	DEG_SCF_TRCP1_1	hsa05321	Inflammatory bowel disease (IBD)
ELME000136	nsp07	P40763	DOC_WW_Pin1_4	hsa05321	Inflammatory bowel disease (IBD)
ELME000136	nsp07	P84022	DOC_WW_Pin1_4	hsa05321	Inflammatory bowel disease (IBD)
ELME000136	nsp07	Q04206	DOC_WW_Pin1_4	hsa05321	Inflammatory bowel disease (IBD)
ELME000005	N	P27986	LIG_SH3_1	hsa04750	Inflammatory mediator regulation of TRP channels
ELME000058	nsp02	Q14643	LIG_EVH1_2	hsa04750	Inflammatory mediator regulation of TRP channels
ELME000442	nsp09	O14920	MOD_Plk_1	hsa05164	Influenza A
ELME000289	nsp06	P05412	DEG_SCF_FBW7_1	hsa05164	Influenza A
ELME000136	nsp07	P05412	DOC_WW_Pin1_4	hsa05164	Influenza A
ELME000269	nsp02,nsp08	P17181	DEG_SCF_TRCP1_1	hsa05164	Influenza A
ELME000269	nsp02,nsp08	P19838	DEG_SCF_TRCP1_1	hsa05164	Influenza A
ELME000269	nsp02,nsp08	P25963	DEG_SCF_TRCP1_1	hsa05164	Influenza A
ELME000005	N	P27986	LIG_SH3_1	hsa05164	Influenza A
ELME000136	nsp07	P29590	DOC_WW_Pin1_4	hsa05164	Influenza A
ELME000335	nsp10	P29590	LIG_SUMO_SIM_anti_2	hsa05164	Influenza A
ELME000136	nsp07	P31749	DOC_WW_Pin1_4	hsa05164	Influenza A
ELME000432	nsp09	P45985	DOC_MAPK_MEF2A_6	hsa05164	Influenza A
ELME000429	nsp10	P55211	MOD_CDK_SPK_2	hsa05164	Influenza A
ELME000461	nsp12	P55211	MOD_DYRK1A_RPxSP_1	hsa05164	Influenza A
ELME000136	nsp07	Q04206	DOC_WW_Pin1_4	hsa05164	Influenza A
ELME000136	nsp07	Q14653	DOC_WW_Pin1_4	hsa05164	Influenza A
ELME000269	nsp02,nsp08	Q15653	DEG_SCF_TRCP1_1	hsa05164	Influenza A
ELME000045	nsp09	Q92793	LIG_NRBOX	hsa05164	Influenza A
ELME000269	nsp02,nsp08	P18848	DEG_SCF_TRCP1_1	hsa04911	Insulin secretion
ELME000442	nsp09	O14920	MOD_Plk_1	hsa04910	Insulin signaling pathway
ELME000005	N	P27986	LIG_SH3_1	hsa04910	Insulin signaling pathway
ELME000136	nsp07	P31749	DOC_WW_Pin1_4	hsa04910	Insulin signaling pathway
ELME000136	nsp07	P35568	DOC_WW_Pin1_4	hsa04910	Insulin signaling pathway
ELME000289	nsp06	P36956	DEG_SCF_FBW7_1	hsa04910	Insulin signaling pathway
ELME000442	nsp09	P36956	MOD_Plk_1	hsa04910	Insulin signaling pathway
ELME000159	nsp07	Q07889	MOD_ProDKin_1	hsa04910	Insulin signaling pathway
ELME000045	nsp09	Q9UBK2	LIG_NRBOX	hsa04910	Insulin signaling pathway
ELME000117	nsp09	P25942	LIG_TRAF2_1	hsa04672	Intestinal immune network for IgA production
ELME000133	nsp04,nsp07	P25942	LIG_TRAF6	hsa04672	Intestinal immune network for IgA production
ELME000117	nsp09	P36941	LIG_TRAF2_1	hsa04672	Intestinal immune network for IgA production
ELME000289	nsp06	P01106	DEG_SCF_FBW7_1	hsa04630	Jak STAT signaling pathway
ELME000136	nsp07	P01106	DOC_WW_Pin1_4	hsa04630	Jak STAT signaling pathway
ELME000159	nsp07	P01106	MOD_ProDKin_1	hsa04630	Jak STAT signaling pathway
ELME000269	nsp02,nsp08	P16471	DEG_SCF_TRCP1_1	hsa04630	Jak STAT signaling pathway
ELME000269	nsp02,nsp08	P17181	DEG_SCF_TRCP1_1	hsa04630	Jak STAT signaling pathway
ELME000007	nsp12	P24385	LIG_Rb_LxCxE_1	hsa04630	Jak STAT signaling pathway
ELME000005	N	P27986	LIG_SH3_1	hsa04630	Jak STAT signaling pathway
ELME000136	nsp07	P31749	DOC_WW_Pin1_4	hsa04630	Jak STAT signaling pathway
ELME000163	nsp06	P40189	LIG_SH2_STAT3	hsa04630	Jak STAT signaling pathway
ELME000163	nsp06	P40238	LIG_SH2_STAT3	hsa04630	Jak STAT signaling pathway
ELME000136	nsp07	P40763	DOC_WW_Pin1_4	hsa04630	Jak STAT signaling pathway
ELME000159	nsp07	Q07889	MOD_ProDKin_1	hsa04630	Jak STAT signaling pathway
ELME000045	nsp09	Q92793	LIG_NRBOX	hsa04630	Jak STAT signaling pathway
ELME000163	nsp06	Q99062	LIG_SH2_STAT3	hsa04630	Jak STAT signaling pathway
ELME000269	nsp02,nsp08	P19838	DEG_SCF_TRCP1_1	hsa05134	Legionellosis
ELME000269	nsp02,nsp08	P25963	DEG_SCF_TRCP1_1	hsa05134	Legionellosis
ELME000429	nsp10	P55211	MOD_CDK_SPK_2	hsa05134	Legionellosis
ELME000461	nsp12	P55211	MOD_DYRK1A_RPxSP_1	hsa05134	Legionellosis
ELME000159	nsp07	Q00613	MOD_ProDKin_1	hsa05134	Legionellosis
ELME000136	nsp07	Q04206	DOC_WW_Pin1_4	hsa05134	Legionellosis
ELME000289	nsp06	P05412	DEG_SCF_FBW7_1	hsa05140	Leishmaniasis
ELME000136	nsp07	P05412	DOC_WW_Pin1_4	hsa05140	Leishmaniasis
ELME000136	nsp07	P14598	DOC_WW_Pin1_4	hsa05140	Leishmaniasis
ELME000269	nsp02,nsp08	P19838	DEG_SCF_TRCP1_1	hsa05140	Leishmaniasis
ELME000269	nsp02,nsp08	P25963	DEG_SCF_TRCP1_1	hsa05140	Leishmaniasis
ELME000133	nsp04,nsp07	P51617	LIG_TRAF6	hsa05140	Leishmaniasis
ELME000136	nsp07	Q04206	DOC_WW_Pin1_4	hsa05140	Leishmaniasis
ELME000269	nsp02,nsp08	Q15653	DEG_SCF_TRCP1_1	hsa05140	Leishmaniasis
ELME000136	nsp07	P14598	DOC_WW_Pin1_4	hsa04670	Leukocyte transendothelial migration
ELME000005	N	P27986	LIG_SH3_1	hsa04670	Leukocyte transendothelial migration
ELME000269	nsp02,nsp08	P35222	DEG_SCF_TRCP1_1	hsa04670	Leukocyte transendothelial migration
ELME000136	nsp07	P35222	DOC_WW_Pin1_4	hsa04670	Leukocyte transendothelial migration
ELME000136	nsp07	Q05397	DOC_WW_Pin1_4	hsa04670	Leukocyte transendothelial migration
ELME000159	nsp07	Q05397	MOD_ProDKin_1	hsa04670	Leukocyte transendothelial migration
ELME000058	nsp02	P21817	LIG_EVH1_2	hsa04730	Long term depression
ELME000058	nsp02	Q13255	LIG_EVH1_2	hsa04730	Long term depression
ELME000058	nsp02	Q14643	LIG_EVH1_2	hsa04730	Long term depression
ELME000269	nsp02,nsp08	P18848	DEG_SCF_TRCP1_1	hsa04720	Long term potentiation
ELME000058	nsp02	Q13255	LIG_EVH1_2	hsa04720	Long term potentiation
ELME000058	nsp02	Q14643	LIG_EVH1_2	hsa04720	Long term potentiation
ELME000045	nsp09	Q92793	LIG_NRBOX	hsa04720	Long term potentiation
ELME000432	nsp09	Q8NEZ4	DOC_MAPK_MEF2A_6	hsa00310	Lysine degradation
ELME000117	nsp09	P25942	LIG_TRAF2_1	hsa05144	Malaria
ELME000133	nsp04,nsp07	P25942	LIG_TRAF6	hsa05144	Malaria
ELME000442	nsp09	O14920	MOD_Plk_1	hsa04010	MAPK signaling pathway
ELME000237	N	O95644	DOC_PP2B_PxIxI_1	hsa04010	MAPK signaling pathway
ELME000461	nsp12	O95644	MOD_DYRK1A_RPxSP_1	hsa04010	MAPK signaling pathway
ELME000289	nsp06	P01106	DEG_SCF_FBW7_1	hsa04010	MAPK signaling pathway
ELME000136	nsp07	P01106	DOC_WW_Pin1_4	hsa04010	MAPK signaling pathway
ELME000159	nsp07	P01106	MOD_ProDKin_1	hsa04010	MAPK signaling pathway
ELME000106	nsp10	P04637	DOC_CyclinA_RxL_1	hsa04010	MAPK signaling pathway
ELME000136	nsp07	P04637	DOC_WW_Pin1_4	hsa04010	MAPK signaling pathway
ELME000289	nsp06	P05412	DEG_SCF_FBW7_1	hsa04010	MAPK signaling pathway
ELME000136	nsp07	P05412	DOC_WW_Pin1_4	hsa04010	MAPK signaling pathway
ELME000005	N	P10636	LIG_SH3_1	hsa04010	MAPK signaling pathway
ELME000269	nsp02,nsp08	P18848	DEG_SCF_TRCP1_1	hsa04010	MAPK signaling pathway
ELME000269	nsp02,nsp08	P19838	DEG_SCF_TRCP1_1	hsa04010	MAPK signaling pathway
ELME000136	nsp07	P22736	DOC_WW_Pin1_4	hsa04010	MAPK signaling pathway
ELME000159	nsp07	P28324	MOD_ProDKin_1	hsa04010	MAPK signaling pathway
ELME000136	nsp07	P31749	DOC_WW_Pin1_4	hsa04010	MAPK signaling pathway
ELME000432	nsp09	P45985	DOC_MAPK_MEF2A_6	hsa04010	MAPK signaling pathway
ELME000136	nsp07	Q04206	DOC_WW_Pin1_4	hsa04010	MAPK signaling pathway
ELME000159	nsp07	Q07889	MOD_ProDKin_1	hsa04010	MAPK signaling pathway
ELME000136	nsp07	Q9UER7	DOC_WW_Pin1_4	hsa04010	MAPK signaling pathway
ELME000335	nsp10	Q9UER7	LIG_SUMO_SIM_anti_2	hsa04010	MAPK signaling pathway
ELME000136	nsp07	O15350	DOC_WW_Pin1_4	hsa05162	Measles
ELME000155	nsp15	O15350	LIG_SH3_3	hsa05162	Measles
ELME000106	nsp10	P04637	DOC_CyclinA_RxL_1	hsa05162	Measles
ELME000136	nsp07	P04637	DOC_WW_Pin1_4	hsa05162	Measles
ELME000269	nsp02,nsp08	P17181	DEG_SCF_TRCP1_1	hsa05162	Measles
ELME000269	nsp02,nsp08	P19838	DEG_SCF_TRCP1_1	hsa05162	Measles
ELME000007	nsp12	P24385	LIG_Rb_LxCxE_1	hsa05162	Measles
ELME000289	nsp06	P24864	DEG_SCF_FBW7_1	hsa05162	Measles
ELME000269	nsp02,nsp08	P25963	DEG_SCF_TRCP1_1	hsa05162	Measles
ELME000005	N	P27986	LIG_SH3_1	hsa05162	Measles
ELME000136	nsp07	P31749	DOC_WW_Pin1_4	hsa05162	Measles
ELME000136	nsp07	P40763	DOC_WW_Pin1_4	hsa05162	Measles
ELME000106	nsp10	P46527	DOC_CyclinA_RxL_1	hsa05162	Measles
ELME000136	nsp07	P46527	DOC_WW_Pin1_4	hsa05162	Measles
ELME000133	nsp04,nsp07	P51617	LIG_TRAF6	hsa05162	Measles
ELME000136	nsp07	Q04206	DOC_WW_Pin1_4	hsa05162	Measles
ELME000142	nsp06	Q13291	LIG_TYR_ITSM	hsa05162	Measles
ELME000136	nsp07	Q14653	DOC_WW_Pin1_4	hsa05162	Measles
ELME000269	nsp02,nsp08	Q15653	DEG_SCF_TRCP1_1	hsa05162	Measles
ELME000269	nsp02,nsp08	P35222	DEG_SCF_TRCP1_1	hsa04916	Melanogenesis
ELME000136	nsp07	P35222	DOC_WW_Pin1_4	hsa04916	Melanogenesis
ELME000045	nsp09	Q92793	LIG_NRBOX	hsa04916	Melanogenesis
ELME000106	nsp10	O00716	DOC_CyclinA_RxL_1	hsa05218	Melanoma
ELME000106	nsp10	P04637	DOC_CyclinA_RxL_1	hsa05218	Melanoma
ELME000136	nsp07	P04637	DOC_WW_Pin1_4	hsa05218	Melanoma
ELME000106	nsp10	P06400	DOC_CyclinA_RxL_1	hsa05218	Melanoma
ELME000429	nsp10	P06400	MOD_CDK_SPK_2	hsa05218	Melanoma
ELME000007	nsp12	P24385	LIG_Rb_LxCxE_1	hsa05218	Melanoma
ELME000005	N	P27986	LIG_SH3_1	hsa05218	Melanoma
ELME000136	nsp07	P31749	DOC_WW_Pin1_4	hsa05218	Melanoma
ELME000106	nsp10	P38936	DOC_CyclinA_RxL_1	hsa05218	Melanoma
ELME000140	nsp02	P38936	LIG_PCNA_PIPBox_1	hsa05218	Melanoma
ELME000106	nsp10	Q01094	DOC_CyclinA_RxL_1	hsa05218	Melanoma
ELME000106	nsp10	Q14209	DOC_CyclinA_RxL_1	hsa05218	Melanoma
ELME000140	nsp02	P26358	LIG_PCNA_PIPBox_1	hsa01100	Metabolic pathways
ELME000429	nsp10	P26358	MOD_CDK_SPK_2	hsa01100	Metabolic pathways
ELME000140	nsp02	Q15054	LIG_PCNA_PIPBox_1	hsa01100	Metabolic pathways
ELME000106	nsp10	O00716	DOC_CyclinA_RxL_1	hsa05206	MicroRNAs in cancer
ELME000442	nsp09	O14920	MOD_Plk_1	hsa05206	MicroRNAs in cancer
ELME000162	nsp06	P00749	MOD_OFUCOSY	hsa05206	MicroRNAs in cancer
ELME000289	nsp06	P01106	DEG_SCF_FBW7_1	hsa05206	MicroRNAs in cancer
ELME000136	nsp07	P01106	DOC_WW_Pin1_4	hsa05206	MicroRNAs in cancer
ELME000159	nsp07	P01106	MOD_ProDKin_1	hsa05206	MicroRNAs in cancer
ELME000106	nsp10	P04637	DOC_CyclinA_RxL_1	hsa05206	MicroRNAs in cancer
ELME000136	nsp07	P04637	DOC_WW_Pin1_4	hsa05206	MicroRNAs in cancer
ELME000269	nsp02,nsp08	P19838	DEG_SCF_TRCP1_1	hsa05206	MicroRNAs in cancer
ELME000007	nsp12	P24385	LIG_Rb_LxCxE_1	hsa05206	MicroRNAs in cancer
ELME000289	nsp06	P24864	DEG_SCF_FBW7_1	hsa05206	MicroRNAs in cancer
ELME000140	nsp02	P26358	LIG_PCNA_PIPBox_1	hsa05206	MicroRNAs in cancer
ELME000429	nsp10	P26358	MOD_CDK_SPK_2	hsa05206	MicroRNAs in cancer
ELME000106	nsp10	P30304	DOC_CyclinA_RxL_1	hsa05206	MicroRNAs in cancer
ELME000442	nsp09	P30307	MOD_Plk_1	hsa05206	MicroRNAs in cancer
ELME000136	nsp07	P35568	DOC_WW_Pin1_4	hsa05206	MicroRNAs in cancer
ELME000106	nsp10	P38936	DOC_CyclinA_RxL_1	hsa05206	MicroRNAs in cancer
ELME000140	nsp02	P38936	LIG_PCNA_PIPBox_1	hsa05206	MicroRNAs in cancer
ELME000136	nsp07	P40763	DOC_WW_Pin1_4	hsa05206	MicroRNAs in cancer
ELME000106	nsp10	P46527	DOC_CyclinA_RxL_1	hsa05206	MicroRNAs in cancer
ELME000136	nsp07	P46527	DOC_WW_Pin1_4	hsa05206	MicroRNAs in cancer
ELME000292	nsp04	P46531	DEG_SCF_FBW7_2	hsa05206	MicroRNAs in cancer
ELME000136	nsp07	P46531	DOC_WW_Pin1_4	hsa05206	MicroRNAs in cancer
ELME000106	nsp10	Q01094	DOC_CyclinA_RxL_1	hsa05206	MicroRNAs in cancer
ELME000159	nsp07	Q07889	MOD_ProDKin_1	hsa05206	MicroRNAs in cancer
ELME000007	nsp12	Q13547	LIG_Rb_LxCxE_1	hsa05206	MicroRNAs in cancer
ELME000106	nsp10	Q14209	DOC_CyclinA_RxL_1	hsa05206	MicroRNAs in cancer
ELME000045	nsp09	Q92793	LIG_NRBOX	hsa05206	MicroRNAs in cancer
ELME000140	nsp02	P18858	LIG_PCNA_PIPBox_1	hsa03430	Mismatch repair
ELME000007	nsp12	P35251	LIG_Rb_LxCxE_1	hsa03430	Mismatch repair
ELME000140	nsp02	P52701	LIG_PCNA_PIPBox_1	hsa03430	Mismatch repair
ELME000140	nsp02	Q15054	LIG_PCNA_PIPBox_1	hsa03430	Mismatch repair
ELME000442	nsp09	O14920	MOD_Plk_1	hsa04150	mTOR signaling pathway
ELME000005	N	P27986	LIG_SH3_1	hsa04150	mTOR signaling pathway
ELME000136	nsp07	P31749	DOC_WW_Pin1_4	hsa04150	mTOR signaling pathway
ELME000136	nsp07	P35568	DOC_WW_Pin1_4	hsa04150	mTOR signaling pathway
ELME000159	nsp07	Q16665	MOD_ProDKin_1	hsa04150	mTOR signaling pathway
ELME000237	N	O95644	DOC_PP2B_PxIxI_1	hsa04650	Natural killer cell mediated cytotoxicity
ELME000461	nsp12	O95644	MOD_DYRK1A_RPxSP_1	hsa04650	Natural killer cell mediated cytotoxicity
ELME000269	nsp02,nsp08	P17181	DEG_SCF_TRCP1_1	hsa04650	Natural killer cell mediated cytotoxicity
ELME000005	N	P27986	LIG_SH3_1	hsa04650	Natural killer cell mediated cytotoxicity
ELME000159	nsp07	Q07889	MOD_ProDKin_1	hsa04650	Natural killer cell mediated cytotoxicity
ELME000142	nsp06	Q9BZW8	LIG_TYR_ITSM	hsa04650	Natural killer cell mediated cytotoxicity
ELME000142	nsp06	O43613	LIG_TYR_ITSM	hsa04080	Neuroactive ligand receptor interaction
ELME000269	nsp02,nsp08	P16471	DEG_SCF_TRCP1_1	hsa04080	Neuroactive ligand receptor interaction
ELME000058	nsp02	Q13255	LIG_EVH1_2	hsa04080	Neuroactive ligand receptor interaction
ELME000269	nsp02,nsp08	O00221	DEG_SCF_TRCP1_1	hsa04722	Neurotrophin signaling pathway
ELME000442	nsp09	O14920	MOD_Plk_1	hsa04722	Neurotrophin signaling pathway
ELME000136	nsp07	O15350	DOC_WW_Pin1_4	hsa04722	Neurotrophin signaling pathway
ELME000155	nsp15	O15350	LIG_SH3_3	hsa04722	Neurotrophin signaling pathway
ELME000133	nsp04,nsp07	O43187	LIG_TRAF6	hsa04722	Neurotrophin signaling pathway
ELME000432	nsp09	O43353	DOC_MAPK_MEF2A_6	hsa04722	Neurotrophin signaling pathway
ELME000133	nsp04,nsp07	O43353	LIG_TRAF6	hsa04722	Neurotrophin signaling pathway
ELME000425	nsp04,N	O43524	DOC_PP2A_B56_1	hsa04722	Neurotrophin signaling pathway
ELME000106	nsp10	P04637	DOC_CyclinA_RxL_1	hsa04722	Neurotrophin signaling pathway
ELME000136	nsp07	P04637	DOC_WW_Pin1_4	hsa04722	Neurotrophin signaling pathway
ELME000289	nsp06	P05412	DEG_SCF_FBW7_1	hsa04722	Neurotrophin signaling pathway
ELME000136	nsp07	P05412	DOC_WW_Pin1_4	hsa04722	Neurotrophin signaling pathway
ELME000269	nsp02,nsp08	P18848	DEG_SCF_TRCP1_1	hsa04722	Neurotrophin signaling pathway
ELME000269	nsp02,nsp08	P19838	DEG_SCF_TRCP1_1	hsa04722	Neurotrophin signaling pathway
ELME000269	nsp02,nsp08	P25963	DEG_SCF_TRCP1_1	hsa04722	Neurotrophin signaling pathway
ELME000005	N	P27986	LIG_SH3_1	hsa04722	Neurotrophin signaling pathway
ELME000136	nsp07	P31749	DOC_WW_Pin1_4	hsa04722	Neurotrophin signaling pathway
ELME000136	nsp07	P35568	DOC_WW_Pin1_4	hsa04722	Neurotrophin signaling pathway
ELME000133	nsp04,nsp07	P51617	LIG_TRAF6	hsa04722	Neurotrophin signaling pathway
ELME000136	nsp07	Q04206	DOC_WW_Pin1_4	hsa04722	Neurotrophin signaling pathway
ELME000159	nsp07	Q07889	MOD_ProDKin_1	hsa04722	Neurotrophin signaling pathway
ELME000269	nsp02,nsp08	Q15653	DEG_SCF_TRCP1_1	hsa04722	Neurotrophin signaling pathway
ELME000442	nsp09	O14920	MOD_Plk_1	hsa04064	NF kappa B signaling pathway
ELME000162	nsp06	P00749	MOD_OFUCOSY	hsa04064	NF kappa B signaling pathway
ELME000269	nsp02,nsp08	P19838	DEG_SCF_TRCP1_1	hsa04064	NF kappa B signaling pathway
ELME000117	nsp09	P25942	LIG_TRAF2_1	hsa04064	NF kappa B signaling pathway
ELME000133	nsp04,nsp07	P25942	LIG_TRAF6	hsa04064	NF kappa B signaling pathway
ELME000269	nsp02,nsp08	P25963	DEG_SCF_TRCP1_1	hsa04064	NF kappa B signaling pathway
ELME000117	nsp09	P36941	LIG_TRAF2_1	hsa04064	NF kappa B signaling pathway
ELME000133	nsp04,nsp07	P51617	LIG_TRAF6	hsa04064	NF kappa B signaling pathway
ELME000136	nsp07	Q04206	DOC_WW_Pin1_4	hsa04064	NF kappa B signaling pathway
ELME000005	N	Q06187	LIG_SH3_1	hsa04064	NF kappa B signaling pathway
ELME000133	nsp04,nsp07	Q9Y6Q6	LIG_TRAF6	hsa04064	NF kappa B signaling pathway
ELME000442	nsp09	O14920	MOD_Plk_1	hsa04621	NOD like receptor signaling pathway
ELME000432	nsp09	O43353	DOC_MAPK_MEF2A_6	hsa04621	NOD like receptor signaling pathway
ELME000133	nsp04,nsp07	O43353	LIG_TRAF6	hsa04621	NOD like receptor signaling pathway
ELME000269	nsp02,nsp08	P19838	DEG_SCF_TRCP1_1	hsa04621	NOD like receptor signaling pathway
ELME000269	nsp02,nsp08	P25963	DEG_SCF_TRCP1_1	hsa04621	NOD like receptor signaling pathway
ELME000136	nsp07	Q04206	DOC_WW_Pin1_4	hsa04621	NOD like receptor signaling pathway
ELME000269	nsp02,nsp08	Q15653	DEG_SCF_TRCP1_1	hsa04621	NOD like receptor signaling pathway
ELME000442	nsp09	O14920	MOD_Plk_1	hsa04932	Non alcoholic fatty liver disease (NAFLD)
ELME000289	nsp06	P05412	DEG_SCF_FBW7_1	hsa04932	Non alcoholic fatty liver disease (NAFLD)
ELME000136	nsp07	P05412	DOC_WW_Pin1_4	hsa04932	Non alcoholic fatty liver disease (NAFLD)
ELME000269	nsp02,nsp08	P18848	DEG_SCF_TRCP1_1	hsa04932	Non alcoholic fatty liver disease (NAFLD)
ELME000269	nsp02,nsp08	P19838	DEG_SCF_TRCP1_1	hsa04932	Non alcoholic fatty liver disease (NAFLD)
ELME000005	N	P27986	LIG_SH3_1	hsa04932	Non alcoholic fatty liver disease (NAFLD)
ELME000136	nsp07	P31749	DOC_WW_Pin1_4	hsa04932	Non alcoholic fatty liver disease (NAFLD)
ELME000136	nsp07	P35568	DOC_WW_Pin1_4	hsa04932	Non alcoholic fatty liver disease (NAFLD)
ELME000289	nsp06	P36956	DEG_SCF_FBW7_1	hsa04932	Non alcoholic fatty liver disease (NAFLD)
ELME000442	nsp09	P36956	MOD_Plk_1	hsa04932	Non alcoholic fatty liver disease (NAFLD)
ELME000136	nsp07	Q04206	DOC_WW_Pin1_4	hsa04932	Non alcoholic fatty liver disease (NAFLD)
ELME000140	nsp02	P39748	LIG_PCNA_PIPBox_1	hsa03450	Non homologous end joining
ELME000106	nsp10	O00716	DOC_CyclinA_RxL_1	hsa05223	Non small cell lung cancer
ELME000425	nsp04,N	O43524	DOC_PP2A_B56_1	hsa05223	Non small cell lung cancer
ELME000106	nsp10	P04637	DOC_CyclinA_RxL_1	hsa05223	Non small cell lung cancer
ELME000136	nsp07	P04637	DOC_WW_Pin1_4	hsa05223	Non small cell lung cancer
ELME000106	nsp10	P06400	DOC_CyclinA_RxL_1	hsa05223	Non small cell lung cancer
ELME000429	nsp10	P06400	MOD_CDK_SPK_2	hsa05223	Non small cell lung cancer
ELME000007	nsp12	P24385	LIG_Rb_LxCxE_1	hsa05223	Non small cell lung cancer
ELME000005	N	P27986	LIG_SH3_1	hsa05223	Non small cell lung cancer
ELME000136	nsp07	P31749	DOC_WW_Pin1_4	hsa05223	Non small cell lung cancer
ELME000429	nsp10	P55211	MOD_CDK_SPK_2	hsa05223	Non small cell lung cancer
ELME000461	nsp12	P55211	MOD_DYRK1A_RPxSP_1	hsa05223	Non small cell lung cancer
ELME000106	nsp10	Q01094	DOC_CyclinA_RxL_1	hsa05223	Non small cell lung cancer
ELME000159	nsp07	Q07889	MOD_ProDKin_1	hsa05223	Non small cell lung cancer
ELME000106	nsp10	Q14209	DOC_CyclinA_RxL_1	hsa05223	Non small cell lung cancer
ELME000292	nsp04	P46531	DEG_SCF_FBW7_2	hsa04330	Notch signaling pathway
ELME000136	nsp07	P46531	DOC_WW_Pin1_4	hsa04330	Notch signaling pathway
ELME000007	nsp12	Q13547	LIG_Rb_LxCxE_1	hsa04330	Notch signaling pathway
ELME000045	nsp09	Q92793	LIG_NRBOX	hsa04330	Notch signaling pathway
ELME000136	nsp07	Q9Y618	DOC_WW_Pin1_4	hsa04330	Notch signaling pathway
ELME000140	nsp02	P18858	LIG_PCNA_PIPBox_1	hsa03420	Nucleotide excision repair
ELME000140	nsp02	P28715	LIG_PCNA_PIPBox_1	hsa03420	Nucleotide excision repair
ELME000007	nsp12	P35251	LIG_Rb_LxCxE_1	hsa03420	Nucleotide excision repair
ELME000140	nsp02	Q15054	LIG_PCNA_PIPBox_1	hsa03420	Nucleotide excision repair
ELME000289	nsp06	P24864	DEG_SCF_FBW7_1	hsa04114	Oocyte meiosis
ELME000442	nsp09	P30307	MOD_Plk_1	hsa04114	Oocyte meiosis
ELME000058	nsp02	Q14643	LIG_EVH1_2	hsa04114	Oocyte meiosis
ELME000425	nsp04,N	Q14674	DOC_PP2A_B56_1	hsa04114	Oocyte meiosis
ELME000442	nsp09	Q99640	MOD_Plk_1	hsa04114	Oocyte meiosis
ELME000269	nsp02,nsp08	Q9UKT4	DEG_SCF_TRCP1_1	hsa04114	Oocyte meiosis
ELME000442	nsp09	O14920	MOD_Plk_1	hsa04380	Osteoclast differentiation
ELME000237	N	O95644	DOC_PP2B_PxIxI_1	hsa04380	Osteoclast differentiation
ELME000461	nsp12	O95644	MOD_DYRK1A_RPxSP_1	hsa04380	Osteoclast differentiation
ELME000289	nsp06	P05412	DEG_SCF_FBW7_1	hsa04380	Osteoclast differentiation
ELME000136	nsp07	P05412	DOC_WW_Pin1_4	hsa04380	Osteoclast differentiation
ELME000136	nsp07	P14598	DOC_WW_Pin1_4	hsa04380	Osteoclast differentiation
ELME000269	nsp02,nsp08	P17181	DEG_SCF_TRCP1_1	hsa04380	Osteoclast differentiation
ELME000269	nsp02,nsp08	P19838	DEG_SCF_TRCP1_1	hsa04380	Osteoclast differentiation
ELME000269	nsp02,nsp08	P25963	DEG_SCF_TRCP1_1	hsa04380	Osteoclast differentiation
ELME000005	N	P27986	LIG_SH3_1	hsa04380	Osteoclast differentiation
ELME000136	nsp07	P31749	DOC_WW_Pin1_4	hsa04380	Osteoclast differentiation
ELME000136	nsp07	Q04206	DOC_WW_Pin1_4	hsa04380	Osteoclast differentiation
ELME000005	N	Q06187	LIG_SH3_1	hsa04380	Osteoclast differentiation
ELME000133	nsp04,nsp07	Q9Y6Q6	LIG_TRAF6	hsa04380	Osteoclast differentiation
ELME000237	N	O95644	DOC_PP2B_PxIxI_1	hsa04921	Oxytocin signaling pathway
ELME000461	nsp12	O95644	MOD_DYRK1A_RPxSP_1	hsa04921	Oxytocin signaling pathway
ELME000289	nsp06	P05412	DEG_SCF_FBW7_1	hsa04921	Oxytocin signaling pathway
ELME000136	nsp07	P05412	DOC_WW_Pin1_4	hsa04921	Oxytocin signaling pathway
ELME000058	nsp02	P21817	LIG_EVH1_2	hsa04921	Oxytocin signaling pathway
ELME000007	nsp12	P24385	LIG_Rb_LxCxE_1	hsa04921	Oxytocin signaling pathway
ELME000005	N	P27986	LIG_SH3_1	hsa04921	Oxytocin signaling pathway
ELME000106	nsp10	P38936	DOC_CyclinA_RxL_1	hsa04921	Oxytocin signaling pathway
ELME000140	nsp02	P38936	LIG_PCNA_PIPBox_1	hsa04921	Oxytocin signaling pathway
ELME000058	nsp02	Q14643	LIG_EVH1_2	hsa04921	Oxytocin signaling pathway
ELME000159	nsp07	Q14934	MOD_ProDKin_1	hsa04921	Oxytocin signaling pathway
ELME000136	nsp07	O15350	DOC_WW_Pin1_4	hsa04115	p53 signaling pathway
ELME000155	nsp15	O15350	LIG_SH3_3	hsa04115	p53 signaling pathway
ELME000425	nsp04,N	O96017	DOC_PP2A_B56_1	hsa04115	p53 signaling pathway
ELME000106	nsp10	P04637	DOC_CyclinA_RxL_1	hsa04115	p53 signaling pathway
ELME000136	nsp07	P04637	DOC_WW_Pin1_4	hsa04115	p53 signaling pathway
ELME000007	nsp12	P24385	LIG_Rb_LxCxE_1	hsa04115	p53 signaling pathway
ELME000289	nsp06	P24864	DEG_SCF_FBW7_1	hsa04115	p53 signaling pathway
ELME000106	nsp10	P38936	DOC_CyclinA_RxL_1	hsa04115	p53 signaling pathway
ELME000140	nsp02	P38936	LIG_PCNA_PIPBox_1	hsa04115	p53 signaling pathway
ELME000429	nsp10	P55211	MOD_CDK_SPK_2	hsa04115	p53 signaling pathway
ELME000461	nsp12	P55211	MOD_DYRK1A_RPxSP_1	hsa04115	p53 signaling pathway
ELME000106	nsp10	O00716	DOC_CyclinA_RxL_1	hsa05212	Pancreatic cancer
ELME000442	nsp09	O14920	MOD_Plk_1	hsa05212	Pancreatic cancer
ELME000106	nsp10	P04637	DOC_CyclinA_RxL_1	hsa05212	Pancreatic cancer
ELME000136	nsp07	P04637	DOC_WW_Pin1_4	hsa05212	Pancreatic cancer
ELME000106	nsp10	P06400	DOC_CyclinA_RxL_1	hsa05212	Pancreatic cancer
ELME000429	nsp10	P06400	MOD_CDK_SPK_2	hsa05212	Pancreatic cancer
ELME000269	nsp02,nsp08	P19838	DEG_SCF_TRCP1_1	hsa05212	Pancreatic cancer
ELME000007	nsp12	P24385	LIG_Rb_LxCxE_1	hsa05212	Pancreatic cancer
ELME000005	N	P27986	LIG_SH3_1	hsa05212	Pancreatic cancer
ELME000136	nsp07	P31749	DOC_WW_Pin1_4	hsa05212	Pancreatic cancer
ELME000136	nsp07	P40763	DOC_WW_Pin1_4	hsa05212	Pancreatic cancer
ELME000429	nsp10	P55211	MOD_CDK_SPK_2	hsa05212	Pancreatic cancer
ELME000461	nsp12	P55211	MOD_DYRK1A_RPxSP_1	hsa05212	Pancreatic cancer
ELME000136	nsp07	P84022	DOC_WW_Pin1_4	hsa05212	Pancreatic cancer
ELME000106	nsp10	Q01094	DOC_CyclinA_RxL_1	hsa05212	Pancreatic cancer
ELME000136	nsp07	Q04206	DOC_WW_Pin1_4	hsa05212	Pancreatic cancer
ELME000005	N	Q06609	LIG_SH3_1	hsa05212	Pancreatic cancer
ELME000106	nsp10	Q14209	DOC_CyclinA_RxL_1	hsa05212	Pancreatic cancer
ELME000058	nsp02	Q14643	LIG_EVH1_2	hsa04972	Pancreatic secretion
ELME000429	nsp10	P55211	MOD_CDK_SPK_2	hsa05012	Parkinson's disease
ELME000461	nsp12	P55211	MOD_DYRK1A_RPxSP_1	hsa05012	Parkinson's disease
ELME000136	nsp07	Q9Y6H5	DOC_WW_Pin1_4	hsa05012	Parkinson's disease
ELME000269	nsp02,nsp08	P35222	DEG_SCF_TRCP1_1	hsa05130	Pathogenic Escherichia coli infection
ELME000136	nsp07	P35222	DOC_WW_Pin1_4	hsa05130	Pathogenic Escherichia coli infection
ELME000311	nsp09	P42768	LIG_Actin_WH2_1	hsa05130	Pathogenic Escherichia coli infection
ELME000441	nsp13	P42768	LIG_GBD_Chelix_1	hsa05130	Pathogenic Escherichia coli infection
ELME000106	nsp10	O00716	DOC_CyclinA_RxL_1	hsa05200	Pathways in cancer
ELME000442	nsp09	O14920	MOD_Plk_1	hsa05200	Pathways in cancer
ELME000425	nsp04,N	O15169	DOC_PP2A_B56_1	hsa05200	Pathways in cancer
ELME000289	nsp06	P01106	DEG_SCF_FBW7_1	hsa05200	Pathways in cancer
ELME000136	nsp07	P01106	DOC_WW_Pin1_4	hsa05200	Pathways in cancer
ELME000159	nsp07	P01106	MOD_ProDKin_1	hsa05200	Pathways in cancer
ELME000106	nsp10	P04637	DOC_CyclinA_RxL_1	hsa05200	Pathways in cancer
ELME000136	nsp07	P04637	DOC_WW_Pin1_4	hsa05200	Pathways in cancer
ELME000289	nsp06	P05412	DEG_SCF_FBW7_1	hsa05200	Pathways in cancer
ELME000136	nsp07	P05412	DOC_WW_Pin1_4	hsa05200	Pathways in cancer
ELME000106	nsp10	P06400	DOC_CyclinA_RxL_1	hsa05200	Pathways in cancer
ELME000429	nsp10	P06400	MOD_CDK_SPK_2	hsa05200	Pathways in cancer
ELME000136	nsp07	P10276	DOC_WW_Pin1_4	hsa05200	Pathways in cancer
ELME000159	nsp07	P10276	MOD_ProDKin_1	hsa05200	Pathways in cancer
ELME000103	nsp03	P12644	CLV_PCSK_PC7_1	hsa05200	Pathways in cancer
ELME000269	nsp02,nsp08	P19838	DEG_SCF_TRCP1_1	hsa05200	Pathways in cancer
ELME000007	nsp12	P24385	LIG_Rb_LxCxE_1	hsa05200	Pathways in cancer
ELME000289	nsp06	P24864	DEG_SCF_FBW7_1	hsa05200	Pathways in cancer
ELME000269	nsp02,nsp08	P25963	DEG_SCF_TRCP1_1	hsa05200	Pathways in cancer
ELME000005	N	P27986	LIG_SH3_1	hsa05200	Pathways in cancer
ELME000136	nsp07	P29590	DOC_WW_Pin1_4	hsa05200	Pathways in cancer
ELME000335	nsp10	P29590	LIG_SUMO_SIM_anti_2	hsa05200	Pathways in cancer
ELME000136	nsp07	P31749	DOC_WW_Pin1_4	hsa05200	Pathways in cancer
ELME000269	nsp02,nsp08	P35222	DEG_SCF_TRCP1_1	hsa05200	Pathways in cancer
ELME000136	nsp07	P35222	DOC_WW_Pin1_4	hsa05200	Pathways in cancer
ELME000106	nsp10	P38936	DOC_CyclinA_RxL_1	hsa05200	Pathways in cancer
ELME000140	nsp02	P38936	LIG_PCNA_PIPBox_1	hsa05200	Pathways in cancer
ELME000136	nsp07	P40763	DOC_WW_Pin1_4	hsa05200	Pathways in cancer
ELME000106	nsp10	P46527	DOC_CyclinA_RxL_1	hsa05200	Pathways in cancer
ELME000136	nsp07	P46527	DOC_WW_Pin1_4	hsa05200	Pathways in cancer
ELME000140	nsp02	P52701	LIG_PCNA_PIPBox_1	hsa05200	Pathways in cancer
ELME000429	nsp10	P55211	MOD_CDK_SPK_2	hsa05200	Pathways in cancer
ELME000461	nsp12	P55211	MOD_DYRK1A_RPxSP_1	hsa05200	Pathways in cancer
ELME000136	nsp07	P84022	DOC_WW_Pin1_4	hsa05200	Pathways in cancer
ELME000106	nsp10	Q01094	DOC_CyclinA_RxL_1	hsa05200	Pathways in cancer
ELME000136	nsp07	Q04206	DOC_WW_Pin1_4	hsa05200	Pathways in cancer
ELME000136	nsp07	Q05397	DOC_WW_Pin1_4	hsa05200	Pathways in cancer
ELME000159	nsp07	Q05397	MOD_ProDKin_1	hsa05200	Pathways in cancer
ELME000005	N	Q06609	LIG_SH3_1	hsa05200	Pathways in cancer
ELME000159	nsp07	Q07889	MOD_ProDKin_1	hsa05200	Pathways in cancer
ELME000007	nsp12	Q13547	LIG_Rb_LxCxE_1	hsa05200	Pathways in cancer
ELME000106	nsp10	Q14209	DOC_CyclinA_RxL_1	hsa05200	Pathways in cancer
ELME000159	nsp07	Q16665	MOD_ProDKin_1	hsa05200	Pathways in cancer
ELME000045	nsp09	Q92793	LIG_NRBOX	hsa05200	Pathways in cancer
ELME000163	nsp06	Q99062	LIG_SH2_STAT3	hsa05200	Pathways in cancer
ELME000328	nsp07	P40855	LIG_Pex14_2	hsa04146	Peroxisome
ELME000289	nsp06	P05412	DEG_SCF_FBW7_1	hsa05133	Pertussis
ELME000136	nsp07	P05412	DOC_WW_Pin1_4	hsa05133	Pertussis
ELME000269	nsp02,nsp08	P19838	DEG_SCF_TRCP1_1	hsa05133	Pertussis
ELME000133	nsp04,nsp07	P51617	LIG_TRAF6	hsa05133	Pertussis
ELME000136	nsp07	Q04206	DOC_WW_Pin1_4	hsa05133	Pertussis
ELME000136	nsp07	Q14653	DOC_WW_Pin1_4	hsa05133	Pertussis
ELME000136	nsp07	P14598	DOC_WW_Pin1_4	hsa04145	Phagosome
ELME000005	N	P27986	LIG_SH3_1	hsa04070	Phosphatidylinositol signaling system
ELME000058	nsp02	Q14643	LIG_EVH1_2	hsa04070	Phosphatidylinositol signaling system
ELME000442	nsp09	O14920	MOD_Plk_1	hsa04151	PI3K Akt signaling pathway
ELME000425	nsp04,N	O43524	DOC_PP2A_B56_1	hsa04151	PI3K Akt signaling pathway
ELME000289	nsp06	P01106	DEG_SCF_FBW7_1	hsa04151	PI3K Akt signaling pathway
ELME000136	nsp07	P01106	DOC_WW_Pin1_4	hsa04151	PI3K Akt signaling pathway
ELME000159	nsp07	P01106	MOD_ProDKin_1	hsa04151	PI3K Akt signaling pathway
ELME000106	nsp10	P04637	DOC_CyclinA_RxL_1	hsa04151	PI3K Akt signaling pathway
ELME000136	nsp07	P04637	DOC_WW_Pin1_4	hsa04151	PI3K Akt signaling pathway
ELME000269	nsp02,nsp08	P16471	DEG_SCF_TRCP1_1	hsa04151	PI3K Akt signaling pathway
ELME000269	nsp02,nsp08	P17181	DEG_SCF_TRCP1_1	hsa04151	PI3K Akt signaling pathway
ELME000269	nsp02,nsp08	P18848	DEG_SCF_TRCP1_1	hsa04151	PI3K Akt signaling pathway
ELME000269	nsp02,nsp08	P19838	DEG_SCF_TRCP1_1	hsa04151	PI3K Akt signaling pathway
ELME000136	nsp07	P22736	DOC_WW_Pin1_4	hsa04151	PI3K Akt signaling pathway
ELME000007	nsp12	P24385	LIG_Rb_LxCxE_1	hsa04151	PI3K Akt signaling pathway
ELME000289	nsp06	P24864	DEG_SCF_FBW7_1	hsa04151	PI3K Akt signaling pathway
ELME000005	N	P27986	LIG_SH3_1	hsa04151	PI3K Akt signaling pathway
ELME000136	nsp07	P31749	DOC_WW_Pin1_4	hsa04151	PI3K Akt signaling pathway
ELME000136	nsp07	P35568	DOC_WW_Pin1_4	hsa04151	PI3K Akt signaling pathway
ELME000106	nsp10	P38936	DOC_CyclinA_RxL_1	hsa04151	PI3K Akt signaling pathway
ELME000140	nsp02	P38936	LIG_PCNA_PIPBox_1	hsa04151	PI3K Akt signaling pathway
ELME000106	nsp10	P46527	DOC_CyclinA_RxL_1	hsa04151	PI3K Akt signaling pathway
ELME000136	nsp07	P46527	DOC_WW_Pin1_4	hsa04151	PI3K Akt signaling pathway
ELME000429	nsp10	P55211	MOD_CDK_SPK_2	hsa04151	PI3K Akt signaling pathway
ELME000461	nsp12	P55211	MOD_DYRK1A_RPxSP_1	hsa04151	PI3K Akt signaling pathway
ELME000136	nsp07	Q04206	DOC_WW_Pin1_4	hsa04151	PI3K Akt signaling pathway
ELME000136	nsp07	Q05397	DOC_WW_Pin1_4	hsa04151	PI3K Akt signaling pathway
ELME000159	nsp07	Q05397	MOD_ProDKin_1	hsa04151	PI3K Akt signaling pathway
ELME000159	nsp07	Q07889	MOD_ProDKin_1	hsa04151	PI3K Akt signaling pathway
ELME000106	nsp10	Q08999	DOC_CyclinA_RxL_1	hsa04151	PI3K Akt signaling pathway
ELME000163	nsp06	Q99062	LIG_SH2_STAT3	hsa04151	PI3K Akt signaling pathway
ELME000005	N	P27986	LIG_SH3_1	hsa04611	Platelet activation
ELME000136	nsp07	P31749	DOC_WW_Pin1_4	hsa04611	Platelet activation
ELME000005	N	Q06187	LIG_SH3_1	hsa04611	Platelet activation
ELME000058	nsp02	Q14643	LIG_EVH1_2	hsa04611	Platelet activation
ELME000289	nsp06	P13051	DEG_SCF_FBW7_1	hsa05340	Primary immunodeficiency
ELME000140	nsp02	P13051	LIG_PCNA_PIPBox_1	hsa05340	Primary immunodeficiency
ELME000117	nsp09	P25942	LIG_TRAF2_1	hsa05340	Primary immunodeficiency
ELME000133	nsp04,nsp07	P25942	LIG_TRAF6	hsa05340	Primary immunodeficiency
ELME000005	N	Q06187	LIG_SH3_1	hsa05340	Primary immunodeficiency
ELME000292	nsp04	P46531	DEG_SCF_FBW7_2	hsa05020	Prion diseases
ELME000136	nsp07	P46531	DOC_WW_Pin1_4	hsa05020	Prion diseases
ELME000005	N	P27986	LIG_SH3_1	hsa04914	Progesterone mediated oocyte maturation
ELME000106	nsp10	P30304	DOC_CyclinA_RxL_1	hsa04914	Progesterone mediated oocyte maturation
ELME000442	nsp09	P30307	MOD_Plk_1	hsa04914	Progesterone mediated oocyte maturation
ELME000136	nsp07	P31749	DOC_WW_Pin1_4	hsa04914	Progesterone mediated oocyte maturation
ELME000442	nsp09	Q99640	MOD_Plk_1	hsa04914	Progesterone mediated oocyte maturation
ELME000425	nsp04,N	O43524	DOC_PP2A_B56_1	hsa04917	Prolactin signaling pathway
ELME000269	nsp02,nsp08	P16471	DEG_SCF_TRCP1_1	hsa04917	Prolactin signaling pathway
ELME000269	nsp02,nsp08	P19838	DEG_SCF_TRCP1_1	hsa04917	Prolactin signaling pathway
ELME000007	nsp12	P24385	LIG_Rb_LxCxE_1	hsa04917	Prolactin signaling pathway
ELME000005	N	P27986	LIG_SH3_1	hsa04917	Prolactin signaling pathway
ELME000136	nsp07	P31749	DOC_WW_Pin1_4	hsa04917	Prolactin signaling pathway
ELME000136	nsp07	P40763	DOC_WW_Pin1_4	hsa04917	Prolactin signaling pathway
ELME000136	nsp07	Q04206	DOC_WW_Pin1_4	hsa04917	Prolactin signaling pathway
ELME000159	nsp07	Q07889	MOD_ProDKin_1	hsa04917	Prolactin signaling pathway
ELME000133	nsp04,nsp07	Q9Y6Q6	LIG_TRAF6	hsa04917	Prolactin signaling pathway
ELME000106	nsp10	O00716	DOC_CyclinA_RxL_1	hsa05215	Prostate cancer
ELME000442	nsp09	O14920	MOD_Plk_1	hsa05215	Prostate cancer
ELME000106	nsp10	P04637	DOC_CyclinA_RxL_1	hsa05215	Prostate cancer
ELME000136	nsp07	P04637	DOC_WW_Pin1_4	hsa05215	Prostate cancer
ELME000106	nsp10	P06400	DOC_CyclinA_RxL_1	hsa05215	Prostate cancer
ELME000429	nsp10	P06400	MOD_CDK_SPK_2	hsa05215	Prostate cancer
ELME000269	nsp02,nsp08	P18848	DEG_SCF_TRCP1_1	hsa05215	Prostate cancer
ELME000269	nsp02,nsp08	P19838	DEG_SCF_TRCP1_1	hsa05215	Prostate cancer
ELME000007	nsp12	P24385	LIG_Rb_LxCxE_1	hsa05215	Prostate cancer
ELME000289	nsp06	P24864	DEG_SCF_FBW7_1	hsa05215	Prostate cancer
ELME000269	nsp02,nsp08	P25963	DEG_SCF_TRCP1_1	hsa05215	Prostate cancer
ELME000005	N	P27986	LIG_SH3_1	hsa05215	Prostate cancer
ELME000136	nsp07	P31749	DOC_WW_Pin1_4	hsa05215	Prostate cancer
ELME000269	nsp02,nsp08	P35222	DEG_SCF_TRCP1_1	hsa05215	Prostate cancer
ELME000136	nsp07	P35222	DOC_WW_Pin1_4	hsa05215	Prostate cancer
ELME000106	nsp10	P38936	DOC_CyclinA_RxL_1	hsa05215	Prostate cancer
ELME000140	nsp02	P38936	LIG_PCNA_PIPBox_1	hsa05215	Prostate cancer
ELME000106	nsp10	P46527	DOC_CyclinA_RxL_1	hsa05215	Prostate cancer
ELME000136	nsp07	P46527	DOC_WW_Pin1_4	hsa05215	Prostate cancer
ELME000429	nsp10	P55211	MOD_CDK_SPK_2	hsa05215	Prostate cancer
ELME000461	nsp12	P55211	MOD_DYRK1A_RPxSP_1	hsa05215	Prostate cancer
ELME000106	nsp10	Q01094	DOC_CyclinA_RxL_1	hsa05215	Prostate cancer
ELME000136	nsp07	Q04206	DOC_WW_Pin1_4	hsa05215	Prostate cancer
ELME000159	nsp07	Q07889	MOD_ProDKin_1	hsa05215	Prostate cancer
ELME000106	nsp10	Q14209	DOC_CyclinA_RxL_1	hsa05215	Prostate cancer
ELME000045	nsp09	Q92793	LIG_NRBOX	hsa05215	Prostate cancer
ELME000269	nsp02,nsp08	P18848	DEG_SCF_TRCP1_1	hsa04141	Protein processing in endoplasmic reticulum
ELME000162	nsp06	P00749	MOD_OFUCOSY	hsa05205	Proteoglycans in cancer
ELME000289	nsp06	P01106	DEG_SCF_FBW7_1	hsa05205	Proteoglycans in cancer
ELME000136	nsp07	P01106	DOC_WW_Pin1_4	hsa05205	Proteoglycans in cancer
ELME000159	nsp07	P01106	MOD_ProDKin_1	hsa05205	Proteoglycans in cancer
ELME000106	nsp10	P04637	DOC_CyclinA_RxL_1	hsa05205	Proteoglycans in cancer
ELME000136	nsp07	P04637	DOC_WW_Pin1_4	hsa05205	Proteoglycans in cancer
ELME000007	nsp12	P24385	LIG_Rb_LxCxE_1	hsa05205	Proteoglycans in cancer
ELME000005	N	P27986	LIG_SH3_1	hsa05205	Proteoglycans in cancer
ELME000136	nsp07	P31749	DOC_WW_Pin1_4	hsa05205	Proteoglycans in cancer
ELME000269	nsp02,nsp08	P35222	DEG_SCF_TRCP1_1	hsa05205	Proteoglycans in cancer
ELME000136	nsp07	P35222	DOC_WW_Pin1_4	hsa05205	Proteoglycans in cancer
ELME000106	nsp10	P38936	DOC_CyclinA_RxL_1	hsa05205	Proteoglycans in cancer
ELME000140	nsp02	P38936	LIG_PCNA_PIPBox_1	hsa05205	Proteoglycans in cancer
ELME000136	nsp07	P40763	DOC_WW_Pin1_4	hsa05205	Proteoglycans in cancer
ELME000136	nsp07	Q05397	DOC_WW_Pin1_4	hsa05205	Proteoglycans in cancer
ELME000159	nsp07	Q05397	MOD_ProDKin_1	hsa05205	Proteoglycans in cancer
ELME000159	nsp07	Q07889	MOD_ProDKin_1	hsa05205	Proteoglycans in cancer
ELME000058	nsp02	Q14643	LIG_EVH1_2	hsa05205	Proteoglycans in cancer
ELME000159	nsp07	Q16665	MOD_ProDKin_1	hsa05205	Proteoglycans in cancer
ELME000140	nsp02	Q15054	LIG_PCNA_PIPBox_1	hsa00230	Purine metabolism
ELME000140	nsp02	Q15054	LIG_PCNA_PIPBox_1	hsa00240	Pyrimidine metabolism
ELME000005	N	P27986	LIG_SH3_1	hsa04015	Rap1 signaling pathway
ELME000136	nsp07	P31749	DOC_WW_Pin1_4	hsa04015	Rap1 signaling pathway
ELME000269	nsp02,nsp08	P35222	DEG_SCF_TRCP1_1	hsa04015	Rap1 signaling pathway
ELME000136	nsp07	P35222	DOC_WW_Pin1_4	hsa04015	Rap1 signaling pathway
ELME000442	nsp09	O14920	MOD_Plk_1	hsa04014	Ras signaling pathway
ELME000269	nsp02,nsp08	P19838	DEG_SCF_TRCP1_1	hsa04014	Ras signaling pathway
ELME000005	N	P27986	LIG_SH3_1	hsa04014	Ras signaling pathway
ELME000136	nsp07	P31749	DOC_WW_Pin1_4	hsa04014	Ras signaling pathway
ELME000136	nsp07	Q04206	DOC_WW_Pin1_4	hsa04014	Ras signaling pathway
ELME000159	nsp07	Q07889	MOD_ProDKin_1	hsa04014	Ras signaling pathway
ELME000432	nsp09	Q6VAB6	DOC_MAPK_MEF2A_6	hsa04014	Ras signaling pathway
ELME000313	nsp08	A2VCK8	LIG_Actin_WH2_2	hsa04810	Regulation of actin cytoskeleton
ELME000005	N	P27986	LIG_SH3_1	hsa04810	Regulation of actin cytoskeleton
ELME000311	nsp09	P42768	LIG_Actin_WH2_1	hsa04810	Regulation of actin cytoskeleton
ELME000441	nsp13	P42768	LIG_GBD_Chelix_1	hsa04810	Regulation of actin cytoskeleton
ELME000269	nsp02,nsp08	P98174	DEG_SCF_TRCP1_1	hsa04810	Regulation of actin cytoskeleton
ELME000136	nsp07	Q05397	DOC_WW_Pin1_4	hsa04810	Regulation of actin cytoskeleton
ELME000159	nsp07	Q05397	MOD_ProDKin_1	hsa04810	Regulation of actin cytoskeleton
ELME000159	nsp07	Q07889	MOD_ProDKin_1	hsa04810	Regulation of actin cytoskeleton
ELME000269	nsp02,nsp08	Q5JSP0	DEG_SCF_TRCP1_1	hsa04810	Regulation of actin cytoskeleton
ELME000311	nsp09	Q92558	LIG_Actin_WH2_1	hsa04810	Regulation of actin cytoskeleton
ELME000311	nsp09	Q9Y6W5	LIG_Actin_WH2_1	hsa04810	Regulation of actin cytoskeleton
ELME000005	N	P27986	LIG_SH3_1	hsa04923	Regulation of lipolysis in adipocytes
ELME000136	nsp07	P31749	DOC_WW_Pin1_4	hsa04923	Regulation of lipolysis in adipocytes
ELME000136	nsp07	P35568	DOC_WW_Pin1_4	hsa04923	Regulation of lipolysis in adipocytes
ELME000289	nsp06	P05412	DEG_SCF_FBW7_1	hsa05211	Renal cell carcinoma
ELME000136	nsp07	P05412	DOC_WW_Pin1_4	hsa05211	Renal cell carcinoma
ELME000005	N	P27986	LIG_SH3_1	hsa05211	Renal cell carcinoma
ELME000136	nsp07	P31749	DOC_WW_Pin1_4	hsa05211	Renal cell carcinoma
ELME000159	nsp07	Q07889	MOD_ProDKin_1	hsa05211	Renal cell carcinoma
ELME000159	nsp07	Q16665	MOD_ProDKin_1	hsa05211	Renal cell carcinoma
ELME000045	nsp09	Q92793	LIG_NRBOX	hsa05211	Renal cell carcinoma
ELME000058	nsp02	Q14643	LIG_EVH1_2	hsa04924	Renin secretion
ELME000058	nsp02	Q13255	LIG_EVH1_2	hsa04723	Retrograde endocannabinoid signaling
ELME000058	nsp02	Q14643	LIG_EVH1_2	hsa04723	Retrograde endocannabinoid signaling
ELME000289	nsp06	P05412	DEG_SCF_FBW7_1	hsa05323	Rheumatoid arthritis
ELME000136	nsp07	P05412	DOC_WW_Pin1_4	hsa05323	Rheumatoid arthritis
ELME000133	nsp04,nsp07	Q9Y6Q6	LIG_TRAF6	hsa05323	Rheumatoid arthritis
ELME000442	nsp09	O14920	MOD_Plk_1	hsa04622	RIG I like receptor signaling pathway
ELME000269	nsp02,nsp08	P19838	DEG_SCF_TRCP1_1	hsa04622	RIG I like receptor signaling pathway
ELME000269	nsp02,nsp08	P25963	DEG_SCF_TRCP1_1	hsa04622	RIG I like receptor signaling pathway
ELME000136	nsp07	Q04206	DOC_WW_Pin1_4	hsa04622	RIG I like receptor signaling pathway
ELME000136	nsp07	Q14653	DOC_WW_Pin1_4	hsa04622	RIG I like receptor signaling pathway
ELME000269	nsp02,nsp08	Q15653	DEG_SCF_TRCP1_1	hsa04622	RIG I like receptor signaling pathway
ELME000159	nsp07	P50616	MOD_ProDKin_1	hsa03018	RNA degradation
ELME000136	nsp07	P78543	DOC_WW_Pin1_4	hsa03018	RNA degradation
ELME000335	nsp10	Q8N3Z6	LIG_SUMO_SIM_anti_2	hsa03018	RNA degradation
ELME000335	nsp10	P49792	LIG_SUMO_SIM_anti_2	hsa03013	RNA transport
ELME000058	nsp02	Q14643	LIG_EVH1_2	hsa04970	Salivary secretion
ELME000289	nsp06	P05412	DEG_SCF_FBW7_1	hsa05132	Salmonella infection
ELME000136	nsp07	P05412	DOC_WW_Pin1_4	hsa05132	Salmonella infection
ELME000269	nsp02,nsp08	P19838	DEG_SCF_TRCP1_1	hsa05132	Salmonella infection
ELME000311	nsp09	P42768	LIG_Actin_WH2_1	hsa05132	Salmonella infection
ELME000441	nsp13	P42768	LIG_GBD_Chelix_1	hsa05132	Salmonella infection
ELME000136	nsp07	Q04206	DOC_WW_Pin1_4	hsa05132	Salmonella infection
ELME000311	nsp09	Q92558	LIG_Actin_WH2_1	hsa05132	Salmonella infection
ELME000311	nsp09	Q9Y6W5	LIG_Actin_WH2_1	hsa05132	Salmonella infection
ELME000136	nsp07	P05067	DOC_WW_Pin1_4	hsa04726	Serotonergic synapse
ELME000058	nsp02	Q14643	LIG_EVH1_2	hsa04726	Serotonergic synapse
ELME000442	nsp09	O14920	MOD_Plk_1	hsa05131	Shigellosis
ELME000432	nsp09	O43353	DOC_MAPK_MEF2A_6	hsa05131	Shigellosis
ELME000133	nsp04,nsp07	O43353	LIG_TRAF6	hsa05131	Shigellosis
ELME000269	nsp02,nsp08	P19838	DEG_SCF_TRCP1_1	hsa05131	Shigellosis
ELME000269	nsp02,nsp08	P25963	DEG_SCF_TRCP1_1	hsa05131	Shigellosis
ELME000311	nsp09	P42768	LIG_Actin_WH2_1	hsa05131	Shigellosis
ELME000441	nsp13	P42768	LIG_GBD_Chelix_1	hsa05131	Shigellosis
ELME000136	nsp07	Q04206	DOC_WW_Pin1_4	hsa05131	Shigellosis
ELME000269	nsp02,nsp08	Q15653	DEG_SCF_TRCP1_1	hsa05131	Shigellosis
ELME000311	nsp09	Q92558	LIG_Actin_WH2_1	hsa05131	Shigellosis
ELME000311	nsp09	Q9Y6W5	LIG_Actin_WH2_1	hsa05131	Shigellosis
ELME000425	nsp04,N	O15169	DOC_PP2A_B56_1	hsa04550	Signaling pathways regulating pluripotency of stem cells
ELME000289	nsp06	P01106	DEG_SCF_FBW7_1	hsa04550	Signaling pathways regulating pluripotency of stem cells
ELME000136	nsp07	P01106	DOC_WW_Pin1_4	hsa04550	Signaling pathways regulating pluripotency of stem cells
ELME000159	nsp07	P01106	MOD_ProDKin_1	hsa04550	Signaling pathways regulating pluripotency of stem cells
ELME000103	nsp03	P12644	CLV_PCSK_PC7_1	hsa04550	Signaling pathways regulating pluripotency of stem cells
ELME000005	N	P27986	LIG_SH3_1	hsa04550	Signaling pathways regulating pluripotency of stem cells
ELME000136	nsp07	P31749	DOC_WW_Pin1_4	hsa04550	Signaling pathways regulating pluripotency of stem cells
ELME000269	nsp02,nsp08	P35222	DEG_SCF_TRCP1_1	hsa04550	Signaling pathways regulating pluripotency of stem cells
ELME000136	nsp07	P35222	DOC_WW_Pin1_4	hsa04550	Signaling pathways regulating pluripotency of stem cells
ELME000163	nsp06	P40189	LIG_SH2_STAT3	hsa04550	Signaling pathways regulating pluripotency of stem cells
ELME000136	nsp07	P40763	DOC_WW_Pin1_4	hsa04550	Signaling pathways regulating pluripotency of stem cells
ELME000136	nsp07	P84022	DOC_WW_Pin1_4	hsa04550	Signaling pathways regulating pluripotency of stem cells
ELME000461	nsp12	Q02363	MOD_DYRK1A_RPxSP_1	hsa04550	Signaling pathways regulating pluripotency of stem cells
ELME000106	nsp10	O00716	DOC_CyclinA_RxL_1	hsa05222	Small cell lung cancer
ELME000442	nsp09	O14920	MOD_Plk_1	hsa05222	Small cell lung cancer
ELME000289	nsp06	P01106	DEG_SCF_FBW7_1	hsa05222	Small cell lung cancer
ELME000136	nsp07	P01106	DOC_WW_Pin1_4	hsa05222	Small cell lung cancer
ELME000159	nsp07	P01106	MOD_ProDKin_1	hsa05222	Small cell lung cancer
ELME000106	nsp10	P04637	DOC_CyclinA_RxL_1	hsa05222	Small cell lung cancer
ELME000136	nsp07	P04637	DOC_WW_Pin1_4	hsa05222	Small cell lung cancer
ELME000106	nsp10	P06400	DOC_CyclinA_RxL_1	hsa05222	Small cell lung cancer
ELME000429	nsp10	P06400	MOD_CDK_SPK_2	hsa05222	Small cell lung cancer
ELME000269	nsp02,nsp08	P19838	DEG_SCF_TRCP1_1	hsa05222	Small cell lung cancer
ELME000007	nsp12	P24385	LIG_Rb_LxCxE_1	hsa05222	Small cell lung cancer
ELME000289	nsp06	P24864	DEG_SCF_FBW7_1	hsa05222	Small cell lung cancer
ELME000269	nsp02,nsp08	P25963	DEG_SCF_TRCP1_1	hsa05222	Small cell lung cancer
ELME000005	N	P27986	LIG_SH3_1	hsa05222	Small cell lung cancer
ELME000136	nsp07	P31749	DOC_WW_Pin1_4	hsa05222	Small cell lung cancer
ELME000106	nsp10	P46527	DOC_CyclinA_RxL_1	hsa05222	Small cell lung cancer
ELME000136	nsp07	P46527	DOC_WW_Pin1_4	hsa05222	Small cell lung cancer
ELME000429	nsp10	P55211	MOD_CDK_SPK_2	hsa05222	Small cell lung cancer
ELME000461	nsp12	P55211	MOD_DYRK1A_RPxSP_1	hsa05222	Small cell lung cancer
ELME000106	nsp10	Q01094	DOC_CyclinA_RxL_1	hsa05222	Small cell lung cancer
ELME000136	nsp07	Q04206	DOC_WW_Pin1_4	hsa05222	Small cell lung cancer
ELME000136	nsp07	Q05397	DOC_WW_Pin1_4	hsa05222	Small cell lung cancer
ELME000159	nsp07	Q05397	MOD_ProDKin_1	hsa05222	Small cell lung cancer
ELME000106	nsp10	Q14209	DOC_CyclinA_RxL_1	hsa05222	Small cell lung cancer
ELME000106	nsp10	P04637	DOC_CyclinA_RxL_1	hsa04071	Sphingolipid signaling pathway
ELME000136	nsp07	P04637	DOC_WW_Pin1_4	hsa04071	Sphingolipid signaling pathway
ELME000269	nsp02,nsp08	P19838	DEG_SCF_TRCP1_1	hsa04071	Sphingolipid signaling pathway
ELME000005	N	P27986	LIG_SH3_1	hsa04071	Sphingolipid signaling pathway
ELME000136	nsp07	P31749	DOC_WW_Pin1_4	hsa04071	Sphingolipid signaling pathway
ELME000136	nsp07	Q04206	DOC_WW_Pin1_4	hsa04071	Sphingolipid signaling pathway
ELME000117	nsp09	P25942	LIG_TRAF2_1	hsa05322	Systemic lupus erythematosus
ELME000133	nsp04,nsp07	P25942	LIG_TRAF6	hsa05322	Systemic lupus erythematosus
ELME000269	nsp02,nsp08	O00221	DEG_SCF_TRCP1_1	hsa04660	T cell receptor signaling pathway
ELME000442	nsp09	O14920	MOD_Plk_1	hsa04660	T cell receptor signaling pathway
ELME000237	N	O95644	DOC_PP2B_PxIxI_1	hsa04660	T cell receptor signaling pathway
ELME000461	nsp12	O95644	MOD_DYRK1A_RPxSP_1	hsa04660	T cell receptor signaling pathway
ELME000289	nsp06	P05412	DEG_SCF_FBW7_1	hsa04660	T cell receptor signaling pathway
ELME000136	nsp07	P05412	DOC_WW_Pin1_4	hsa04660	T cell receptor signaling pathway
ELME000269	nsp02,nsp08	P19838	DEG_SCF_TRCP1_1	hsa04660	T cell receptor signaling pathway
ELME000269	nsp02,nsp08	P25963	DEG_SCF_TRCP1_1	hsa04660	T cell receptor signaling pathway
ELME000005	N	P27986	LIG_SH3_1	hsa04660	T cell receptor signaling pathway
ELME000136	nsp07	P31749	DOC_WW_Pin1_4	hsa04660	T cell receptor signaling pathway
ELME000136	nsp07	Q04206	DOC_WW_Pin1_4	hsa04660	T cell receptor signaling pathway
ELME000159	nsp07	Q07889	MOD_ProDKin_1	hsa04660	T cell receptor signaling pathway
ELME000269	nsp02,nsp08	Q12959	DEG_SCF_TRCP1_1	hsa04660	T cell receptor signaling pathway
ELME000269	nsp02,nsp08	Q15653	DEG_SCF_TRCP1_1	hsa04660	T cell receptor signaling pathway
ELME000289	nsp06	P01106	DEG_SCF_FBW7_1	hsa04350	TGF beta signaling pathway
ELME000136	nsp07	P01106	DOC_WW_Pin1_4	hsa04350	TGF beta signaling pathway
ELME000159	nsp07	P01106	MOD_ProDKin_1	hsa04350	TGF beta signaling pathway
ELME000159	nsp07	P08047	MOD_ProDKin_1	hsa04350	TGF beta signaling pathway
ELME000103	nsp03	P12644	CLV_PCSK_PC7_1	hsa04350	TGF beta signaling pathway
ELME000106	nsp10	P28749	DOC_CyclinA_RxL_1	hsa04350	TGF beta signaling pathway
ELME000136	nsp07	P84022	DOC_WW_Pin1_4	hsa04350	TGF beta signaling pathway
ELME000461	nsp12	Q02363	MOD_DYRK1A_RPxSP_1	hsa04350	TGF beta signaling pathway
ELME000045	nsp09	Q92793	LIG_NRBOX	hsa04350	TGF beta signaling pathway
ELME000289	nsp06	P01106	DEG_SCF_FBW7_1	hsa05216	Thyroid cancer
ELME000136	nsp07	P01106	DOC_WW_Pin1_4	hsa05216	Thyroid cancer
ELME000159	nsp07	P01106	MOD_ProDKin_1	hsa05216	Thyroid cancer
ELME000106	nsp10	P04637	DOC_CyclinA_RxL_1	hsa05216	Thyroid cancer
ELME000136	nsp07	P04637	DOC_WW_Pin1_4	hsa05216	Thyroid cancer
ELME000007	nsp12	P24385	LIG_Rb_LxCxE_1	hsa05216	Thyroid cancer
ELME000269	nsp02,nsp08	P35222	DEG_SCF_TRCP1_1	hsa05216	Thyroid cancer
ELME000136	nsp07	P35222	DOC_WW_Pin1_4	hsa05216	Thyroid cancer
ELME000289	nsp06	P01106	DEG_SCF_FBW7_1	hsa04919	Thyroid hormone signaling pathway
ELME000136	nsp07	P01106	DOC_WW_Pin1_4	hsa04919	Thyroid hormone signaling pathway
ELME000159	nsp07	P01106	MOD_ProDKin_1	hsa04919	Thyroid hormone signaling pathway
ELME000106	nsp10	P04637	DOC_CyclinA_RxL_1	hsa04919	Thyroid hormone signaling pathway
ELME000136	nsp07	P04637	DOC_WW_Pin1_4	hsa04919	Thyroid hormone signaling pathway
ELME000103	nsp03	P12644	CLV_PCSK_PC7_1	hsa04919	Thyroid hormone signaling pathway
ELME000007	nsp12	P24385	LIG_Rb_LxCxE_1	hsa04919	Thyroid hormone signaling pathway
ELME000005	N	P27986	LIG_SH3_1	hsa04919	Thyroid hormone signaling pathway
ELME000136	nsp07	P31749	DOC_WW_Pin1_4	hsa04919	Thyroid hormone signaling pathway
ELME000269	nsp02,nsp08	P35222	DEG_SCF_TRCP1_1	hsa04919	Thyroid hormone signaling pathway
ELME000136	nsp07	P35222	DOC_WW_Pin1_4	hsa04919	Thyroid hormone signaling pathway
ELME000292	nsp04	P46531	DEG_SCF_FBW7_2	hsa04919	Thyroid hormone signaling pathway
ELME000136	nsp07	P46531	DOC_WW_Pin1_4	hsa04919	Thyroid hormone signaling pathway
ELME000429	nsp10	P55211	MOD_CDK_SPK_2	hsa04919	Thyroid hormone signaling pathway
ELME000461	nsp12	P55211	MOD_DYRK1A_RPxSP_1	hsa04919	Thyroid hormone signaling pathway
ELME000007	nsp12	Q13547	LIG_Rb_LxCxE_1	hsa04919	Thyroid hormone signaling pathway
ELME000045	nsp09	Q15596	LIG_NRBOX	hsa04919	Thyroid hormone signaling pathway
ELME000045	nsp09	Q15648	LIG_NRBOX	hsa04919	Thyroid hormone signaling pathway
ELME000159	nsp07	Q16665	MOD_ProDKin_1	hsa04919	Thyroid hormone signaling pathway
ELME000045	nsp09	Q92793	LIG_NRBOX	hsa04919	Thyroid hormone signaling pathway
ELME000269	nsp02,nsp08	P18848	DEG_SCF_TRCP1_1	hsa04918	Thyroid hormone synthesis
ELME000058	nsp02	Q14643	LIG_EVH1_2	hsa04918	Thyroid hormone synthesis
ELME000136	nsp07	P31749	DOC_WW_Pin1_4	hsa04530	Tight junction
ELME000269	nsp02,nsp08	P35222	DEG_SCF_TRCP1_1	hsa04530	Tight junction
ELME000136	nsp07	P35222	DOC_WW_Pin1_4	hsa04530	Tight junction
ELME000442	nsp09	O14920	MOD_Plk_1	hsa04668	TNF signaling pathway
ELME000289	nsp06	P05412	DEG_SCF_FBW7_1	hsa04668	TNF signaling pathway
ELME000136	nsp07	P05412	DOC_WW_Pin1_4	hsa04668	TNF signaling pathway
ELME000269	nsp02,nsp08	P18848	DEG_SCF_TRCP1_1	hsa04668	TNF signaling pathway
ELME000269	nsp02,nsp08	P19838	DEG_SCF_TRCP1_1	hsa04668	TNF signaling pathway
ELME000117	nsp09	P20333	LIG_TRAF2_1	hsa04668	TNF signaling pathway
ELME000269	nsp02,nsp08	P25963	DEG_SCF_TRCP1_1	hsa04668	TNF signaling pathway
ELME000005	N	P27986	LIG_SH3_1	hsa04668	TNF signaling pathway
ELME000136	nsp07	P31749	DOC_WW_Pin1_4	hsa04668	TNF signaling pathway
ELME000432	nsp09	P45985	DOC_MAPK_MEF2A_6	hsa04668	TNF signaling pathway
ELME000136	nsp07	Q04206	DOC_WW_Pin1_4	hsa04668	TNF signaling pathway
ELME000442	nsp09	O14920	MOD_Plk_1	hsa04620	Toll like receptor signaling pathway
ELME000289	nsp06	P05412	DEG_SCF_FBW7_1	hsa04620	Toll like receptor signaling pathway
ELME000136	nsp07	P05412	DOC_WW_Pin1_4	hsa04620	Toll like receptor signaling pathway
ELME000269	nsp02,nsp08	P17181	DEG_SCF_TRCP1_1	hsa04620	Toll like receptor signaling pathway
ELME000269	nsp02,nsp08	P19838	DEG_SCF_TRCP1_1	hsa04620	Toll like receptor signaling pathway
ELME000117	nsp09	P25942	LIG_TRAF2_1	hsa04620	Toll like receptor signaling pathway
ELME000133	nsp04,nsp07	P25942	LIG_TRAF6	hsa04620	Toll like receptor signaling pathway
ELME000269	nsp02,nsp08	P25963	DEG_SCF_TRCP1_1	hsa04620	Toll like receptor signaling pathway
ELME000005	N	P27986	LIG_SH3_1	hsa04620	Toll like receptor signaling pathway
ELME000136	nsp07	P31749	DOC_WW_Pin1_4	hsa04620	Toll like receptor signaling pathway
ELME000432	nsp09	P45985	DOC_MAPK_MEF2A_6	hsa04620	Toll like receptor signaling pathway
ELME000133	nsp04,nsp07	P51617	LIG_TRAF6	hsa04620	Toll like receptor signaling pathway
ELME000136	nsp07	Q04206	DOC_WW_Pin1_4	hsa04620	Toll like receptor signaling pathway
ELME000136	nsp07	Q14653	DOC_WW_Pin1_4	hsa04620	Toll like receptor signaling pathway
ELME000442	nsp09	O14920	MOD_Plk_1	hsa05145	Toxoplasmosis
ELME000269	nsp02,nsp08	P19838	DEG_SCF_TRCP1_1	hsa05145	Toxoplasmosis
ELME000117	nsp09	P25942	LIG_TRAF2_1	hsa05145	Toxoplasmosis
ELME000133	nsp04,nsp07	P25942	LIG_TRAF6	hsa05145	Toxoplasmosis
ELME000269	nsp02,nsp08	P25963	DEG_SCF_TRCP1_1	hsa05145	Toxoplasmosis
ELME000005	N	P27986	LIG_SH3_1	hsa05145	Toxoplasmosis
ELME000136	nsp07	P31749	DOC_WW_Pin1_4	hsa05145	Toxoplasmosis
ELME000136	nsp07	P40763	DOC_WW_Pin1_4	hsa05145	Toxoplasmosis
ELME000133	nsp04,nsp07	P51617	LIG_TRAF6	hsa05145	Toxoplasmosis
ELME000429	nsp10	P55211	MOD_CDK_SPK_2	hsa05145	Toxoplasmosis
ELME000461	nsp12	P55211	MOD_DYRK1A_RPxSP_1	hsa05145	Toxoplasmosis
ELME000136	nsp07	Q04206	DOC_WW_Pin1_4	hsa05145	Toxoplasmosis
ELME000269	nsp02,nsp08	Q15653	DEG_SCF_TRCP1_1	hsa05145	Toxoplasmosis
ELME000162	nsp06	P00749	MOD_OFUCOSY	hsa05202	Transcriptional misregulation in cancer
ELME000162	nsp06	P00750	MOD_OFUCOSY	hsa05202	Transcriptional misregulation in cancer
ELME000289	nsp06	P01106	DEG_SCF_FBW7_1	hsa05202	Transcriptional misregulation in cancer
ELME000136	nsp07	P01106	DOC_WW_Pin1_4	hsa05202	Transcriptional misregulation in cancer
ELME000159	nsp07	P01106	MOD_ProDKin_1	hsa05202	Transcriptional misregulation in cancer
ELME000106	nsp10	P04637	DOC_CyclinA_RxL_1	hsa05202	Transcriptional misregulation in cancer
ELME000136	nsp07	P04637	DOC_WW_Pin1_4	hsa05202	Transcriptional misregulation in cancer
ELME000159	nsp07	P08047	MOD_ProDKin_1	hsa05202	Transcriptional misregulation in cancer
ELME000136	nsp07	P10276	DOC_WW_Pin1_4	hsa05202	Transcriptional misregulation in cancer
ELME000159	nsp07	P10276	MOD_ProDKin_1	hsa05202	Transcriptional misregulation in cancer
ELME000269	nsp02,nsp08	P19838	DEG_SCF_TRCP1_1	hsa05202	Transcriptional misregulation in cancer
ELME000117	nsp09	P25942	LIG_TRAF2_1	hsa05202	Transcriptional misregulation in cancer
ELME000133	nsp04,nsp07	P25942	LIG_TRAF6	hsa05202	Transcriptional misregulation in cancer
ELME000159	nsp07	P28324	MOD_ProDKin_1	hsa05202	Transcriptional misregulation in cancer
ELME000136	nsp07	P29590	DOC_WW_Pin1_4	hsa05202	Transcriptional misregulation in cancer
ELME000335	nsp10	P29590	LIG_SUMO_SIM_anti_2	hsa05202	Transcriptional misregulation in cancer
ELME000106	nsp10	P38936	DOC_CyclinA_RxL_1	hsa05202	Transcriptional misregulation in cancer
ELME000140	nsp02	P38936	LIG_PCNA_PIPBox_1	hsa05202	Transcriptional misregulation in cancer
ELME000159	nsp07	P41212	MOD_ProDKin_1	hsa05202	Transcriptional misregulation in cancer
ELME000106	nsp10	P46527	DOC_CyclinA_RxL_1	hsa05202	Transcriptional misregulation in cancer
ELME000136	nsp07	P46527	DOC_WW_Pin1_4	hsa05202	Transcriptional misregulation in cancer
ELME000432	nsp09	P57682	DOC_MAPK_MEF2A_6	hsa05202	Transcriptional misregulation in cancer
ELME000461	nsp12	Q02363	MOD_DYRK1A_RPxSP_1	hsa05202	Transcriptional misregulation in cancer
ELME000136	nsp07	Q04206	DOC_WW_Pin1_4	hsa05202	Transcriptional misregulation in cancer
ELME000136	nsp07	Q05397	DOC_WW_Pin1_4	hsa05202	Transcriptional misregulation in cancer
ELME000159	nsp07	Q05397	MOD_ProDKin_1	hsa05202	Transcriptional misregulation in cancer
ELME000007	nsp12	Q13547	LIG_Rb_LxCxE_1	hsa05202	Transcriptional misregulation in cancer
ELME000133	nsp04,nsp07	O43187	LIG_TRAF6	hsa05152	Tuberculosis
ELME000432	nsp09	O43353	DOC_MAPK_MEF2A_6	hsa05152	Tuberculosis
ELME000133	nsp04,nsp07	O43353	LIG_TRAF6	hsa05152	Tuberculosis
ELME000269	nsp02,nsp08	P19838	DEG_SCF_TRCP1_1	hsa05152	Tuberculosis
ELME000136	nsp07	P31749	DOC_WW_Pin1_4	hsa05152	Tuberculosis
ELME000133	nsp04,nsp07	P51617	LIG_TRAF6	hsa05152	Tuberculosis
ELME000429	nsp10	P55211	MOD_CDK_SPK_2	hsa05152	Tuberculosis
ELME000461	nsp12	P55211	MOD_DYRK1A_RPxSP_1	hsa05152	Tuberculosis
ELME000136	nsp07	Q04206	DOC_WW_Pin1_4	hsa05152	Tuberculosis
ELME000045	nsp09	Q92793	LIG_NRBOX	hsa05152	Tuberculosis
ELME000442	nsp09	O14920	MOD_Plk_1	hsa04930	Type II diabetes mellitus
ELME000005	N	P27986	LIG_SH3_1	hsa04930	Type II diabetes mellitus
ELME000136	nsp07	P35568	DOC_WW_Pin1_4	hsa04930	Type II diabetes mellitus
ELME000136	nsp07	P29590	DOC_WW_Pin1_4	hsa04120	Ubiquitin mediated proteolysis
ELME000335	nsp10	P29590	LIG_SUMO_SIM_anti_2	hsa04120	Ubiquitin mediated proteolysis
ELME000136	nsp07	Q969H0	DOC_WW_Pin1_4	hsa04120	Ubiquitin mediated proteolysis
ELME000335	nsp10	Q9UBT2	LIG_SUMO_SIM_anti_2	hsa04120	Ubiquitin mediated proteolysis
ELME000058	nsp02	Q14643	LIG_EVH1_2	hsa04270	Vascular smooth muscle contraction
ELME000005	N	P27986	LIG_SH3_1	hsa04370	VEGF signaling pathway
ELME000136	nsp07	P31749	DOC_WW_Pin1_4	hsa04370	VEGF signaling pathway
ELME000429	nsp10	P55211	MOD_CDK_SPK_2	hsa04370	VEGF signaling pathway
ELME000461	nsp12	P55211	MOD_DYRK1A_RPxSP_1	hsa04370	VEGF signaling pathway
ELME000136	nsp07	Q05397	DOC_WW_Pin1_4	hsa04370	VEGF signaling pathway
ELME000159	nsp07	Q05397	MOD_ProDKin_1	hsa04370	VEGF signaling pathway
ELME000106	nsp10	P04637	DOC_CyclinA_RxL_1	hsa05203	Viral carcinogenesis
ELME000136	nsp07	P04637	DOC_WW_Pin1_4	hsa05203	Viral carcinogenesis
ELME000289	nsp06	P05412	DEG_SCF_FBW7_1	hsa05203	Viral carcinogenesis
ELME000136	nsp07	P05412	DOC_WW_Pin1_4	hsa05203	Viral carcinogenesis
ELME000106	nsp10	P06400	DOC_CyclinA_RxL_1	hsa05203	Viral carcinogenesis
ELME000429	nsp10	P06400	MOD_CDK_SPK_2	hsa05203	Viral carcinogenesis
ELME000269	nsp02,nsp08	P18848	DEG_SCF_TRCP1_1	hsa05203	Viral carcinogenesis
ELME000269	nsp02,nsp08	P19838	DEG_SCF_TRCP1_1	hsa05203	Viral carcinogenesis
ELME000335	nsp10	P23497	LIG_SUMO_SIM_anti_2	hsa05203	Viral carcinogenesis
ELME000007	nsp12	P24385	LIG_Rb_LxCxE_1	hsa05203	Viral carcinogenesis
ELME000289	nsp06	P24864	DEG_SCF_FBW7_1	hsa05203	Viral carcinogenesis
ELME000269	nsp02,nsp08	P25963	DEG_SCF_TRCP1_1	hsa05203	Viral carcinogenesis
ELME000005	N	P27986	LIG_SH3_1	hsa05203	Viral carcinogenesis
ELME000106	nsp10	P28749	DOC_CyclinA_RxL_1	hsa05203	Viral carcinogenesis
ELME000117	nsp09	P36941	LIG_TRAF2_1	hsa05203	Viral carcinogenesis
ELME000106	nsp10	P38936	DOC_CyclinA_RxL_1	hsa05203	Viral carcinogenesis
ELME000140	nsp02	P38936	LIG_PCNA_PIPBox_1	hsa05203	Viral carcinogenesis
ELME000163	nsp06	P40189	LIG_SH2_STAT3	hsa05203	Viral carcinogenesis
ELME000136	nsp07	P40763	DOC_WW_Pin1_4	hsa05203	Viral carcinogenesis
ELME000106	nsp10	P46527	DOC_CyclinA_RxL_1	hsa05203	Viral carcinogenesis
ELME000136	nsp07	P46527	DOC_WW_Pin1_4	hsa05203	Viral carcinogenesis
ELME000136	nsp07	Q04206	DOC_WW_Pin1_4	hsa05203	Viral carcinogenesis
ELME000106	nsp10	Q08999	DOC_CyclinA_RxL_1	hsa05203	Viral carcinogenesis
ELME000269	nsp02,nsp08	Q12959	DEG_SCF_TRCP1_1	hsa05203	Viral carcinogenesis
ELME000007	nsp12	Q13547	LIG_Rb_LxCxE_1	hsa05203	Viral carcinogenesis
ELME000136	nsp07	Q14653	DOC_WW_Pin1_4	hsa05203	Viral carcinogenesis
ELME000045	nsp09	Q92793	LIG_NRBOX	hsa05203	Viral carcinogenesis
ELME000007	nsp12	P24385	LIG_Rb_LxCxE_1	hsa05416	Viral myocarditis
ELME000117	nsp09	P25942	LIG_TRAF2_1	hsa05416	Viral myocarditis
ELME000133	nsp04,nsp07	P25942	LIG_TRAF6	hsa05416	Viral myocarditis
ELME000429	nsp10	P55211	MOD_CDK_SPK_2	hsa05416	Viral myocarditis
ELME000461	nsp12	P55211	MOD_DYRK1A_RPxSP_1	hsa05416	Viral myocarditis
ELME000155	nsp15	Q14118	LIG_SH3_3	hsa05416	Viral myocarditis
ELME000425	nsp04,N	O15169	DOC_PP2A_B56_1	hsa04310	Wnt signaling pathway
ELME000237	N	O95644	DOC_PP2B_PxIxI_1	hsa04310	Wnt signaling pathway
ELME000461	nsp12	O95644	MOD_DYRK1A_RPxSP_1	hsa04310	Wnt signaling pathway
ELME000289	nsp06	P01106	DEG_SCF_FBW7_1	hsa04310	Wnt signaling pathway
ELME000136	nsp07	P01106	DOC_WW_Pin1_4	hsa04310	Wnt signaling pathway
ELME000159	nsp07	P01106	MOD_ProDKin_1	hsa04310	Wnt signaling pathway
ELME000106	nsp10	P04637	DOC_CyclinA_RxL_1	hsa04310	Wnt signaling pathway
ELME000136	nsp07	P04637	DOC_WW_Pin1_4	hsa04310	Wnt signaling pathway
ELME000289	nsp06	P05412	DEG_SCF_FBW7_1	hsa04310	Wnt signaling pathway
ELME000136	nsp07	P05412	DOC_WW_Pin1_4	hsa04310	Wnt signaling pathway
ELME000007	nsp12	P24385	LIG_Rb_LxCxE_1	hsa04310	Wnt signaling pathway
ELME000269	nsp02,nsp08	P35222	DEG_SCF_TRCP1_1	hsa04310	Wnt signaling pathway
ELME000136	nsp07	P35222	DOC_WW_Pin1_4	hsa04310	Wnt signaling pathway
ELME000136	nsp07	P84022	DOC_WW_Pin1_4	hsa04310	Wnt signaling pathway
ELME000159	nsp07	Q14934	MOD_ProDKin_1	hsa04310	Wnt signaling pathway
ELME000045	nsp09	Q92793	LIG_NRBOX	hsa04310	Wnt signaling pathway
